# Supplementary material for: 16-Vertex oblato–hypho-titanaborane [(Cp*Ti)2B14H18]
Source: Royal Society of Chemistry journal article supplement (doi:10.1039/d3cc03952h), 2023-01-01
Supplement: d3cc03952h1.pdf [file d3cc03952h1.pdf]

## *Supplementary Information*

### **16-vertex *Oblato-Hypho*-Titanaborane [(Cp\*Ti)<sub>2</sub>B<sub>14</sub>H<sub>18</sub>]**

Sourav Kar,<sup>\*a</sup> Subhash Bairagi,<sup>\*a</sup> Jean-François Halet<sup>\*b</sup> and Sundargopal Ghosh<sup>\*a</sup>

<sup>a</sup>Department of Chemistry, Indian Institute of Technology Madras, Chennai 600036, India, E-mail: [sghosh@iitm.ac.in](mailto:sghosh@iitm.ac.in)

<sup>b</sup>CNRS–Saint-Gobain–NIMS, IRL 3629, Laboratory for Innovative Key Materials and Structures (LINK), National Institute for Materials Science (NIMS), Tsukuba 305-0044, Japan, E-mail: [jean-francois.halet@univ-rennes1.fr](mailto:jean-francois.halet@univ-rennes1.fr)

<sup>\*</sup>These authors contributed equally to this work.

## Table of contents

|            |                                                                                                                                                                                                                                                                |     |
|------------|----------------------------------------------------------------------------------------------------------------------------------------------------------------------------------------------------------------------------------------------------------------|-----|
| <b>I</b>   | <b>Experimental Details</b>                                                                                                                                                                                                                                    | S4  |
| <b>I.1</b> | <b>Supplementary Data</b>                                                                                                                                                                                                                                      |     |
| Scheme S1  | Synthesis of 16-vertex <i>oblato-hypho</i> titanaboranes <b>1</b> and <b>2</b> , and complex <b>3</b> .                                                                                                                                                        | S5  |
| Figure S1  | Molecular structure and atom labelling diagram of <b>2</b> .                                                                                                                                                                                                   | S5  |
| Figure S2  | Molecular structure and atom labelling diagram of <b>3</b> .                                                                                                                                                                                                   | S6  |
| <b>I.2</b> | <b>Spectroscopic Details</b>                                                                                                                                                                                                                                   |     |
| Figure S3  | ESI-MS spectrum of <b>1</b> .                                                                                                                                                                                                                                  | S7  |
| Figure S4  | <sup>1</sup> H NMR spectrum of <b>1</b> .                                                                                                                                                                                                                      | S7  |
| Figure S5  | <sup>1</sup> H{ <sup>11</sup> B} NMR spectrum of <b>1</b> .                                                                                                                                                                                                    | S8  |
| Figure S6  | <sup>11</sup> B{ <sup>1</sup> H} NMR spectrum of <b>1</b> .                                                                                                                                                                                                    | S8  |
| Figure S7  | <sup>11</sup> B NMR spectrum of <b>1</b> .                                                                                                                                                                                                                     | S9  |
| Figure S8  | <sup>13</sup> C{ <sup>1</sup> H} NMR spectrum of <b>1</b> .                                                                                                                                                                                                    | S9  |
| Figure S9  | <sup>1</sup> H- <sup>11</sup> B HSQC NMR spectrum of <b>1</b> .                                                                                                                                                                                                | S10 |
| Figure S10 | IR spectrum of <b>1</b> .                                                                                                                                                                                                                                      | S10 |
| Figure S11 | ESI-MS spectrum of <b>2</b> .                                                                                                                                                                                                                                  | S11 |
| Figure S12 | <sup>1</sup> H NMR spectrum of <b>2</b> .                                                                                                                                                                                                                      | S11 |
| Figure S13 | <sup>1</sup> H{ <sup>11</sup> B} NMR spectrum of <b>2</b> .                                                                                                                                                                                                    | S12 |
| Figure S14 | <sup>11</sup> B{ <sup>1</sup> H} NMR spectrum of <b>2</b> .                                                                                                                                                                                                    | S12 |
| Figure S15 | <sup>11</sup> B NMR spectrum of <b>2</b> .                                                                                                                                                                                                                     | S13 |
| Figure S16 | <sup>13</sup> C{ <sup>1</sup> H} NMR spectrum of <b>2</b> .                                                                                                                                                                                                    | S13 |
| Figure S17 | <sup>1</sup> H- <sup>11</sup> B HSQC NMR spectrum of <b>2</b> .                                                                                                                                                                                                | S14 |
| Figure S18 | IR spectrum of <b>2</b> .                                                                                                                                                                                                                                      | S14 |
| Figure S19 | Combined UV-vis spectra of <b>1</b> and <b>2</b> .                                                                                                                                                                                                             | S15 |
| Figure S20 | <sup>1</sup> H NMR spectrum of <b>3</b> .                                                                                                                                                                                                                      | S15 |
| Figure S21 | <sup>13</sup> C{ <sup>1</sup> H} NMR spectrum of <b>3</b> .                                                                                                                                                                                                    | S16 |
| <b>I.2</b> | <b>X-ray Analysis Details</b>                                                                                                                                                                                                                                  | S16 |
| <b>II</b>  | <b>Computational Details</b>                                                                                                                                                                                                                                   | S16 |
| Table S1   | Bond parameters of [(Cp*Ti) <sub>2</sub> B <sub>14</sub> H <sub>18</sub> ] ( <b>1</b> ) and [(Cp*Ti) <sub>2</sub> B <sub>14</sub> H <sub>17</sub> Me] ( <b>2</b> ) are compared with their optimized values.                                                   | S17 |
| Figure S22 | Selected molecular orbitals of <b>1</b> .                                                                                                                                                                                                                      | S18 |
| Figure S23 | Selected molecular orbitals of <b>2</b> .                                                                                                                                                                                                                      | S18 |
| Figure S24 | B–H–B and B–Me interactions in <b>2</b> obtained from NBO analysis.                                                                                                                                                                                            | S18 |
| Figure S25 | Contour-line diagram of the Laplacian of the electron density of <b>2</b> in the B11–H–B12 and Ti1–B9–B10–Ti2 plane.                                                                                                                                           | S19 |
| Figure S26 | (a) HOMO of [B <sub>12</sub> H <sub>10</sub> ] <sup>4+</sup> depicting localized orbitals on two adjacent bare boron atoms; (b) and (c) NBO analysis of [B <sub>12</sub> H <sub>10</sub> ] <sup>4+</sup> depicted lone pairs on two adjacent bare boron atoms. | S19 |

|            |                                                                                                                                                  |     |
|------------|--------------------------------------------------------------------------------------------------------------------------------------------------|-----|
| Table S2   | Calculated natural charges ( $q_{\pi}$ , and $q_{\sigma}$ ), natural valence populations ( $Pop$ ) and HOMO–LUMO gaps of <b>1</b> and <b>2</b> . | S20 |
| <b>III</b> | <b>Cartesian Coordinates of all Optimized Structures</b>                                                                                         |     |
| Figure S27 | Optimized geometry of <b>1</b> .                                                                                                                 | S21 |
| Figure S28 | Optimized geometry of <b>2</b> .                                                                                                                 | S22 |
| Figure S29 | Optimized geometry of $[B_{12}H_{10}]^{4-}$ .                                                                                                    | S23 |
| Figure S30 | Optimized geometry of $[B_{12}H_{10}]^{2-}$ .                                                                                                    | S23 |
| <b>IV</b>  | <b>References</b>                                                                                                                                | S24 |

## I Experimental Details

### General Procedures and Instrumentation

All the manipulations were conducted under an Ar/N<sub>2</sub> atmosphere by using standard Schlenk line techniques or in a glove box. Solvents were distilled prior to use under an Ar atmosphere. LiBH<sub>4</sub> (2.0 M in THF) and [BH<sub>3</sub>·SMe<sub>2</sub>] were used as received (Sigma Aldrich). [Cp\*TiCl<sub>3</sub>]<sup>1</sup> was synthesized according to the literature methods. Thin layer chromatography was carried out on 250-μm diameter aluminum supported silica gel TLC plates (MERCK TLC Plates) to separate the reaction mixtures. NMR spectra were recorded on 500 MHz Bruker FT-NMR spectrometer. The residual solvent protons were used as reference (Benzene-*d*<sub>6</sub>, δ = 7.16 ppm; Toluene-*d*<sub>8</sub>, δ = 2.08, 6.97, 7.01, and 7.09 ppm), while a sealed tube that contained [Bu<sub>4</sub>N(B<sub>3</sub>H<sub>8</sub>)]<sup>2</sup> in [D<sub>6</sub>] benzene (δ<sub>B</sub> = -30.07 ppm) was used as an external reference for the <sup>11</sup>B{<sup>1</sup>H} NMR analysis. <sup>11</sup>B{<sup>1</sup>H} NMR spectra were processed with a backward linear prediction algorithm to eliminate the broad <sup>11</sup>B background signal of the NMR tube.<sup>3</sup> The mass spectrum was recorded on Qtof Micro YA263 HRMS and 6545 Qtof LC/MS instruments. Infrared (IR) spectrum was recorded with a JASCO FT/IR-400 spectrometer. UV-vis absorption spectrum was recorded on a Thermo Scientific (Evolution 300) UV-vis spectrometer.

**Synthesis of 1-3:** In a flame-dried Schlenk tube, [[Cp\*TiCl<sub>3</sub>] (0.100 g, 0.35 mmol) was suspended in 20 mL dry toluene and it was charged with lithium borohydride solution 2.0 M in THF (0.6 mL, 1.2 mmol) dropwise at -78 °C and kept under constant stirring for 1 h. To this in situ generated intermediate, an excess amount of [BH<sub>3</sub>·SMe<sub>2</sub>] (1.8 mL, 1.8 mmol) was added and kept at 90 °C for 48 h under stirring condition. After addition of [BH<sub>3</sub>·SMe<sub>2</sub>], the mixture becomes light green. Further, during thermolysis the reaction mixture slowly converted to brown from light green and after 48 h changed to dark brown. After the completion of the reaction, the solvent was removed under vacuum. The residue was extracted with hexane/dichloromethane mixture (60:40 v/v) through a frit using 3 cm of celite. The filtrate was concentrated and the residue was subjected to chromatographic workup on 250-μm diameter aluminium-supported silica gel TLC plates (MERCK TLC Plates). Note that we have done the chromatographic workup using TLC plates inside beakers which were filled with Ar before and after filling with properly distilled eluting solvents. Elution with a hexane/dichloromethane (60:40 v/v) mixture yielded dark green **1** (0.037 g, 38%), dark green **2** (0.011 g, 11%) and pale yellow **3** (0.003 g, 4%) along with previously reported triple-decker sandwich complex [(Cp\*Ti)<sub>2</sub>(μ-η<sup>6</sup>:η<sup>6</sup>-B<sub>6</sub>H<sub>6</sub>)(μ-H)<sub>6</sub>]<sup>4</sup> (**4**) (0.002 g, 3%).

**1:** MS (ESI<sup>+</sup>): *m/z* calculated for [C<sub>20</sub>H<sub>48</sub>B<sub>14</sub>Ti<sub>2</sub> + Na]<sup>+</sup>: 558.4040, found: 558.3986; <sup>1</sup>H NMR (500 MHz, CDCl<sub>3</sub>, 22 °C): δ = 5.78 (br, B-H<sub>t</sub>), 4.20 (br, B-H<sub>t</sub>), 2.31 (br, B-H<sub>t</sub>), 2.26 (s, 30H, 2Cp\*), -0.05 (br, 2H, B-H-B), -2.59 (br, 4H, Ti-H-B) ppm; <sup>11</sup>B{<sup>1</sup>H} NMR (160 MHz, C<sub>6</sub>D<sub>6</sub>, 22 °C): δ = 43.3 (br, 2B), 38.7 (br, 4B), 37.2 (br, 2B), 34.2 (br, 2B), 24.5 (br, 4B) ppm; <sup>13</sup>C{<sup>1</sup>H} NMR (125 MHz, CDCl<sub>3</sub>, 22 °C): δ = 130.59 (C<sub>5</sub>Me<sub>5</sub>), 14.20 (C<sub>5</sub>Me<sub>5</sub>) ppm; IR (KBr, cm<sup>-1</sup>):  $\bar{\nu}$  = 2955, 2924, 2855, 2516 (B-H<sub>t</sub>), 2410 (B-H<sub>t</sub>), 2361 (B-H<sub>t</sub>), 2070 (B-H<sub>b</sub>), 1635, 1461, 1423, 1376, 1264, 1094, 1020, 893, 740; UV-Vis (CH<sub>2</sub>Cl<sub>2</sub>): λ = 268, 426 nm.

**2:** MS (ESI<sup>+</sup>): *m/z* calculated for [C<sub>21</sub>H<sub>50</sub>B<sub>14</sub>Ti<sub>2</sub> + Na]<sup>+</sup>: 573.4169, found: 573.4158; <sup>1</sup>H NMR (500 MHz, CDCl<sub>3</sub>, 22 °C): δ = 5.66 (br, B-H<sub>t</sub>), 4.16 (br, B-H<sub>t</sub>), 2.28 (br, B-H<sub>t</sub>), 2.24 (s, 30H, 2Cp\*), 0.51 (s, 3H, 1CH<sub>3</sub>), -0.05 (br, 2H, B-H-B), -0.53 (br, 4H, Ti-H-B) ppm; <sup>11</sup>B{<sup>1</sup>H} NMR (160 MHz, C<sub>6</sub>D<sub>6</sub>, 22 °C): δ = 52.7 (br, 1B), 41.6 (br, 1B), 38.6 (br, 4B), 36.7 (br, 2B), 35.7 (br, 2B), 35.0 (br, 4B) ppm; <sup>13</sup>C{<sup>1</sup>H} NMR (125 MHz, CDCl<sub>3</sub>, 22 °C): δ = 130.1 (C<sub>5</sub>Me<sub>5</sub>), 14.1 (C<sub>5</sub>Me<sub>5</sub>) ppm; IR (KBr, cm<sup>-1</sup>):  $\bar{\nu}$  = 2956, 2927, 2849, 2520 (B-H<sub>t</sub>), 2413 (B-H<sub>t</sub>), 2363 (B-H<sub>t</sub>), 2037 (B-H<sub>b</sub>), 1724, 1641, 1460, 1377, 1262, 1089, 1018, 895, 742; UV-Vis (CH<sub>2</sub>Cl<sub>2</sub>): λ = 268, 430 nm.

**3:** <sup>1</sup>H NMR (500 MHz, CDCl<sub>3</sub>, 22 °C): δ = 2.15 (s, 60H, 4Cp\*) ppm; <sup>13</sup>C{<sup>1</sup>H} NMR (125 MHz, CDCl<sub>3</sub>, 22 °C): δ = 129.0 (C<sub>5</sub>Me<sub>5</sub>), 12.5 (C<sub>5</sub>Me<sub>5</sub>) ppm.

I.1 Supplementary Data

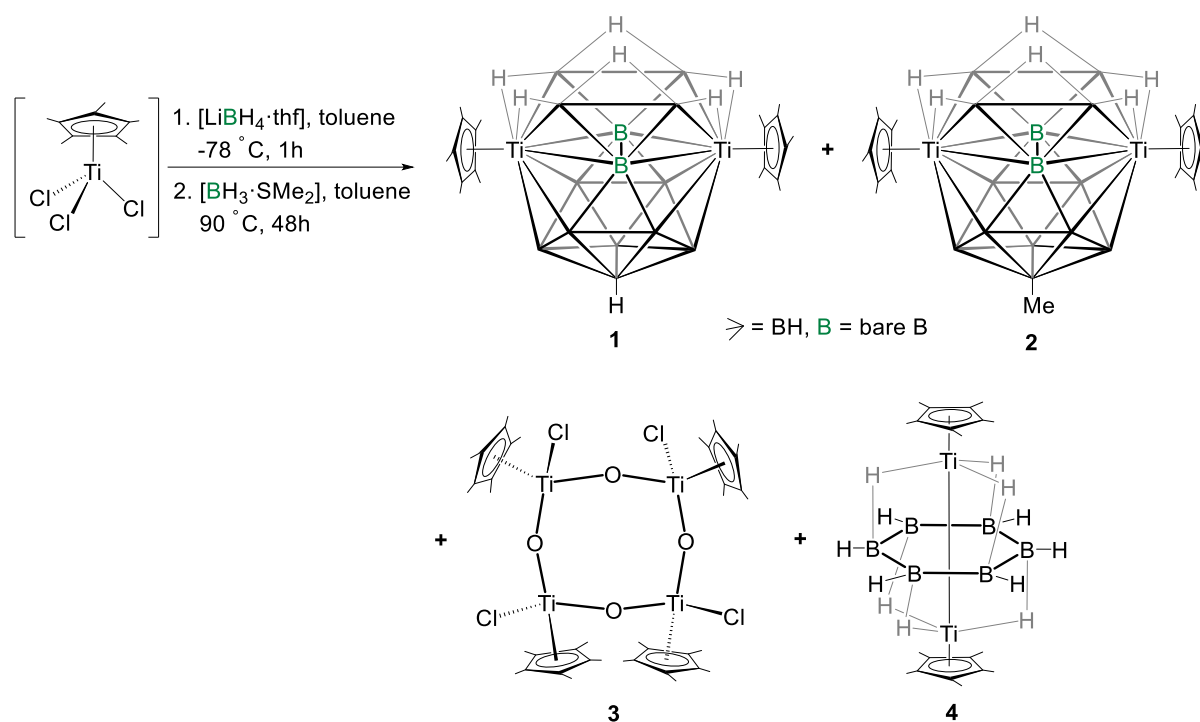

**Scheme S1.** Synthesis of 16-vertex *oblatohypho* titanaboranes **1** and **2**, and [Cp\*TiCl(μ-O)]<sub>4</sub> (**3**).

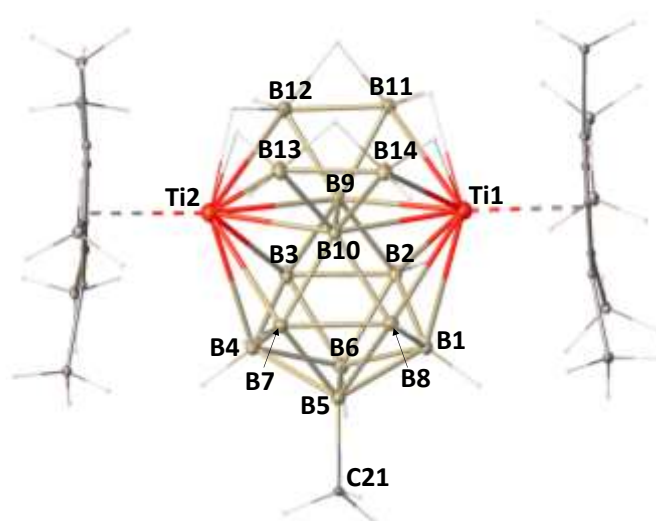

**Figure S1.** Molecular structure and atom labelling diagram of **2**. Selected bond lengths (Å) and angles (°) of **2**: Ti1-B9 2.288(5), Ti1-B10 2.308(5), Ti2-B9 2.306(5), Ti1-B14 2.516(7), Ti1-B1 2.417(6), B1-B8 1.756(8), B11-B12 1.714(9), B9-B10 1.931(8), C21-B5 1.592(8); B9-Ti1-B10 49.7(2), B10-B9-Ti1 65.7(2).

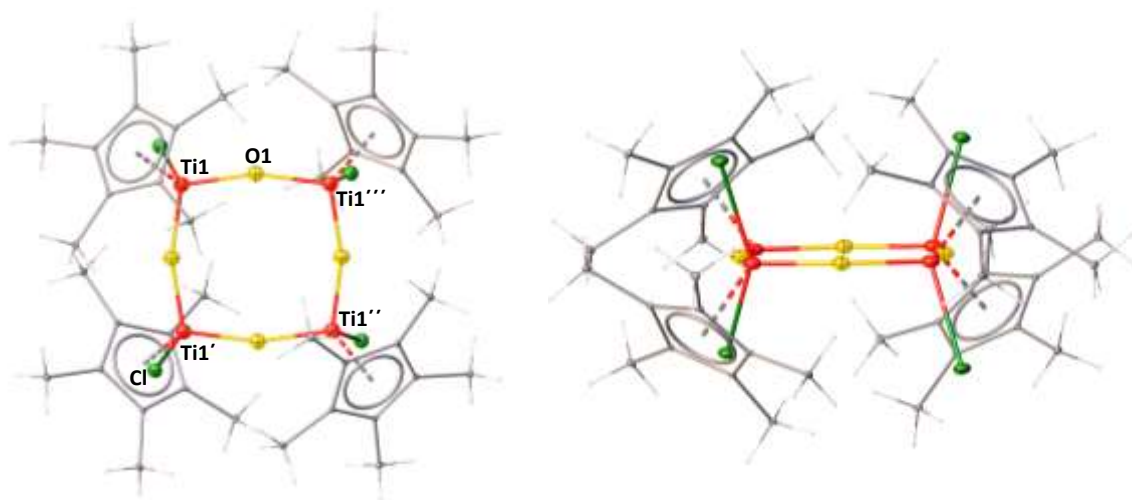

**Figure S2.** Molecular structure and atom labelling diagram of **3**: (left) top view; (right) side view. Selected bond lengths (Å) and angles (°) of **3**: Ti1-O1 1.8211(9), Ti1-Cl 2.305(2); O1-Ti1-O1 106.3(3), O1-Ti1-Cl 103.19(7).

All the spectroscopic data (*vide infra*) as well as single-crystal X-ray data revealed compound **3** as the eight-membered planar titana-oxo species  $[\text{Cp}^*\text{TiCl}(\mu\text{-O})]_4$ , in which four  $\{\text{Cp}^*\text{TiCl}\}$  units are connected by four oxygen atoms forming the ring skeleton (Figure S2). The positions of the Cp\* group are alternating above and below the plane of this ring. Although the bromine analogue of **3**,  $[\text{Cp}^*\text{TiBr}(\mu\text{-O})]_4$  has a nonplanar ring conformation, the analogue  $[\text{Cp}^*\text{TiF}(\mu\text{-O})]_4$  adopts almost a planar ring conformation.<sup>5</sup> Note that the formation of the titanium(IV) oxochloride complex **3** in the reaction mixture may be a result of incomplete metathesis in first instance, followed by hydrolysis or oxidation of the resultant chloride-borohydride intermediate.

## I.2 Spectroscopic Details

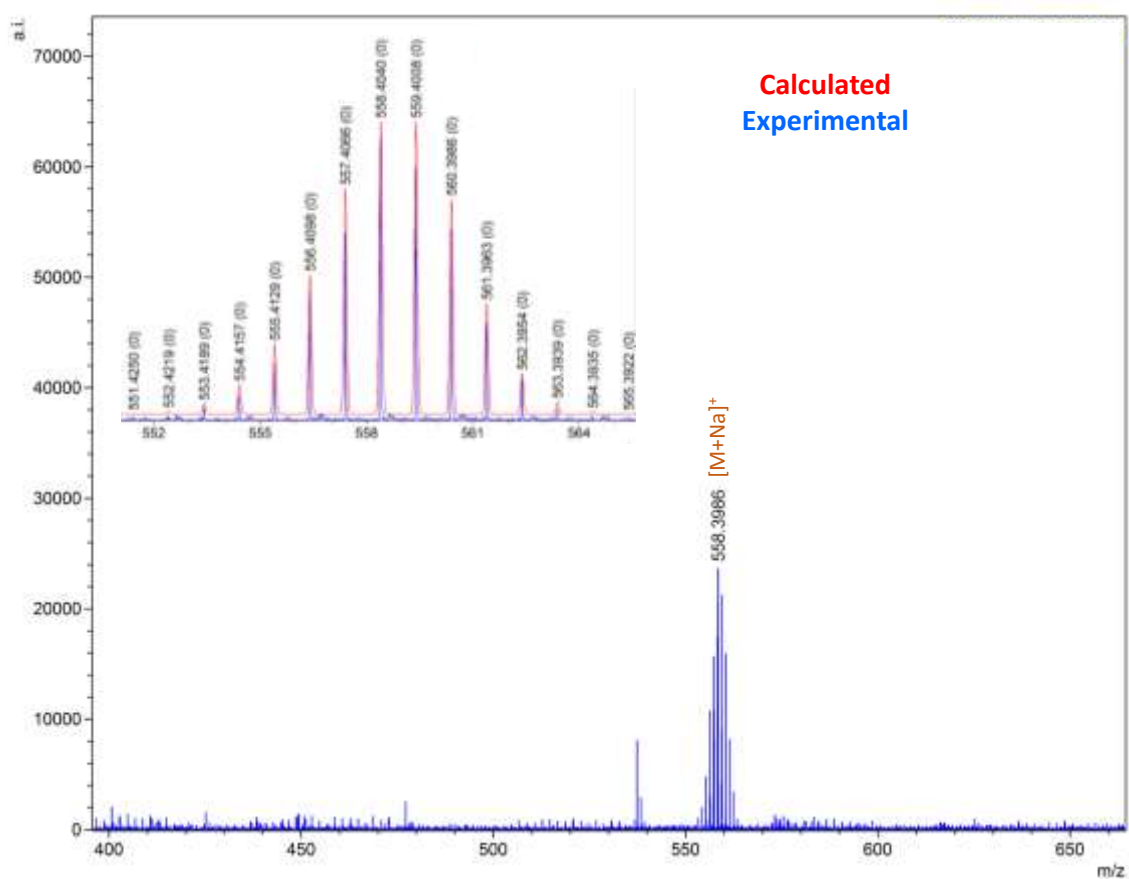

Figure S3. ESI-MS spectrum of **1**.

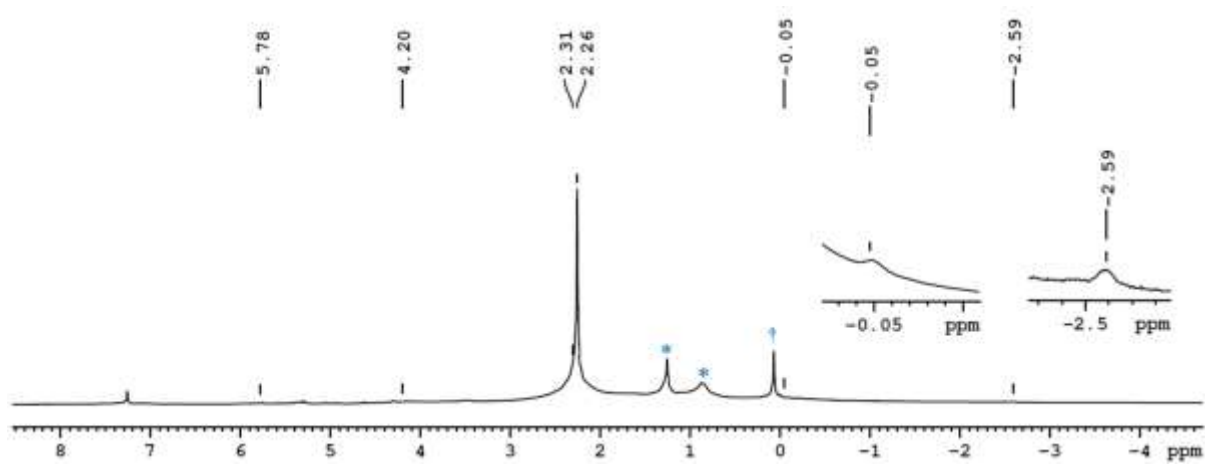

Figure S4. <sup>1</sup>H NMR spectrum of **1** in CDCl<sub>3</sub> (\*Grease, †Silicon grease).

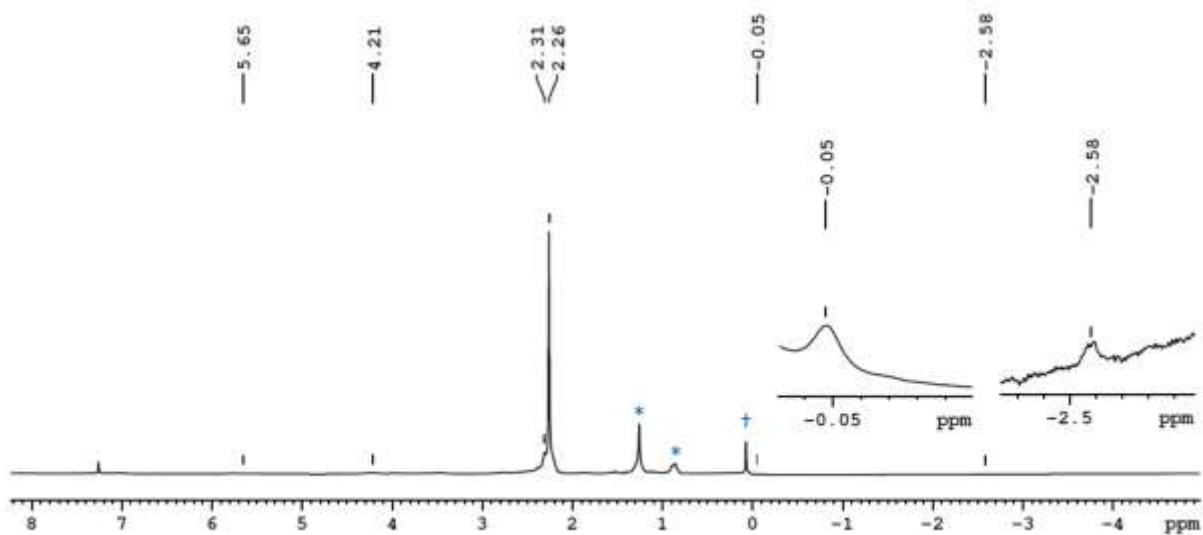

Figure S5.  $^1\text{H}\{^{11}\text{B}\}$  NMR spectrum of **1** in  $\text{CDCl}_3$  (\*Grease, †Silicon grease).

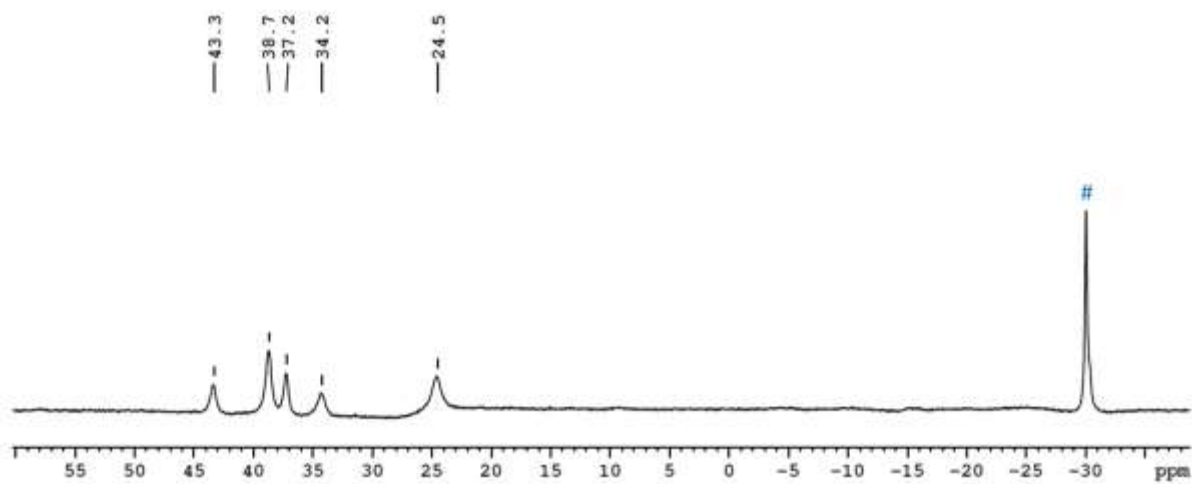

Figure S6.  $^{11}\text{B}\{^1\text{H}\}$  NMR spectrum of **1** in  $\text{C}_6\text{D}_6 \cdot 3$  (# $[\text{Bu}_4\text{N}(\text{B}_3\text{H}_8)]$ ), external reference for the  $^{11}\text{B}\{^1\text{H}\}$  NMR analysis)



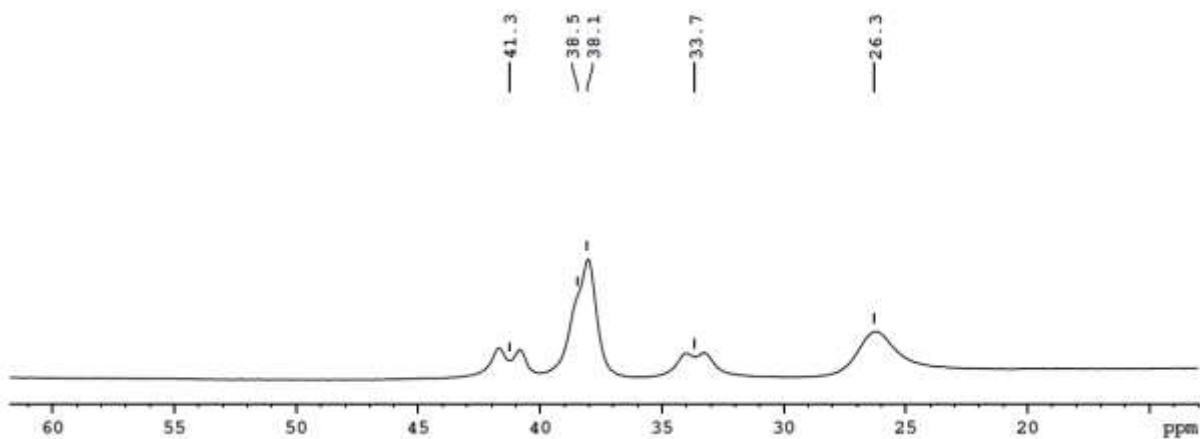

**Figure S7.**  $^{11}\text{B}$  NMR spectrum of **1** in  $\text{CDCl}_3$ .<sup>3</sup> Note that the chemical shifts at  $\delta = 38.1$  and  $38.5$  ppm are merged, in which one of the chemical shifts is for bare boron atoms B1 and B12 (Figure 1) and another one is for a set of four boron atoms (B4, B5, B10, and B11; Figure 1) attached to terminal hydrogens. Also, the chemical shift at  $\delta = 26.3$  broadened, possibly due to the quadrupole moment of  $^{11}\text{B}$  nuclei.

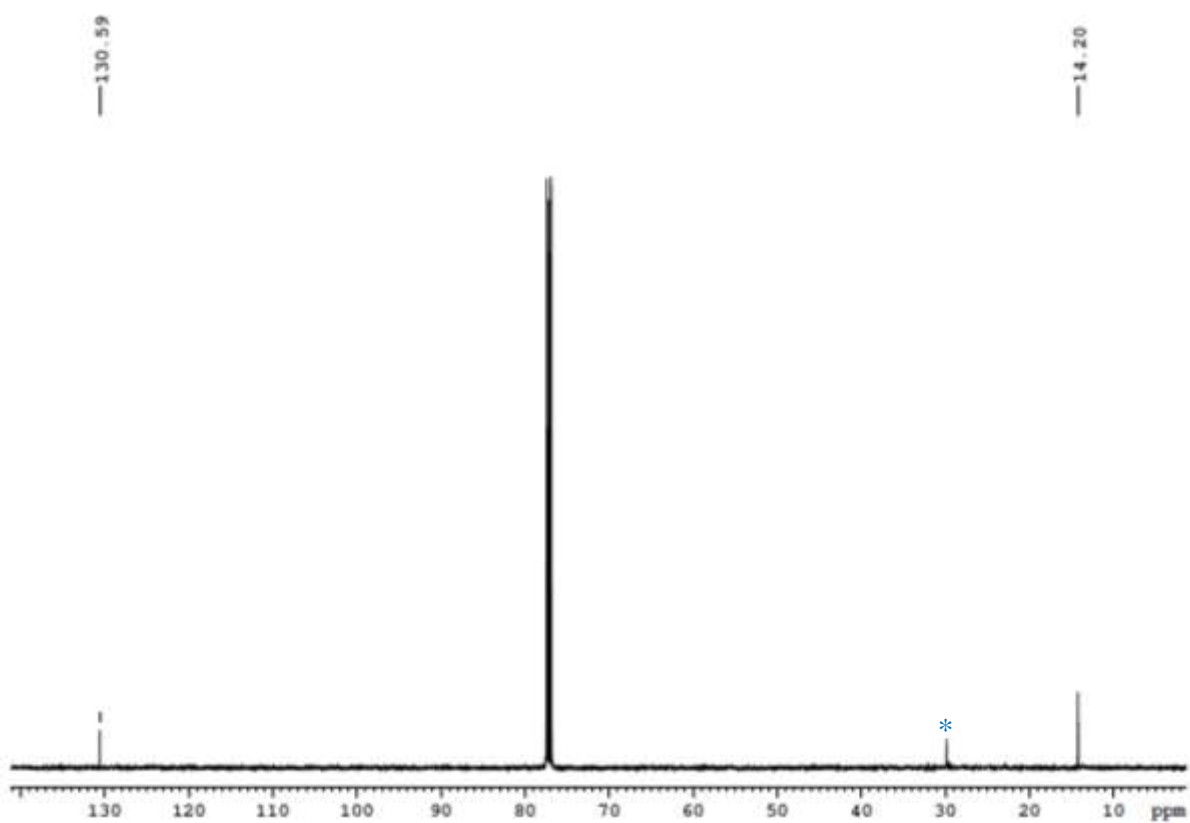

**Figure S8.**  $^{13}\text{C}\{^1\text{H}\}$  NMR spectrum of **1** in  $\text{CDCl}_3$  (\*Grease).

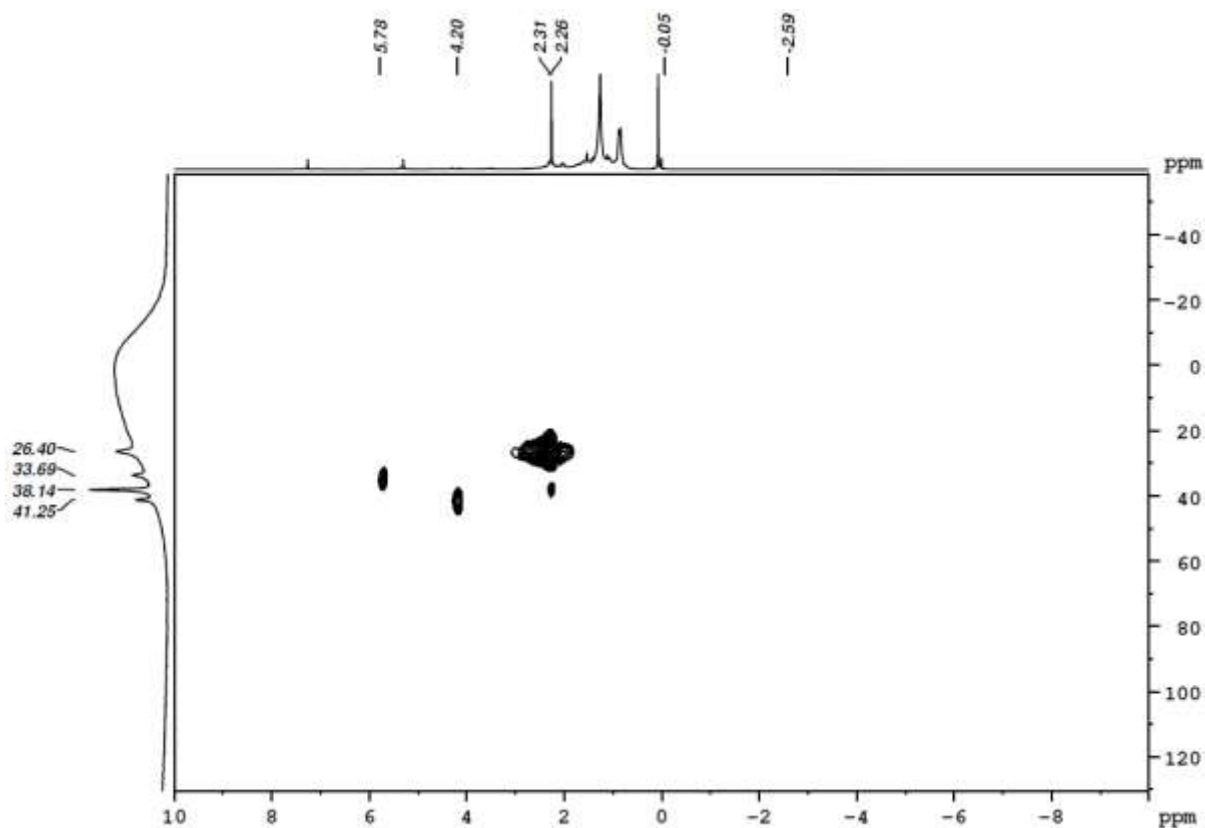

**Figure S9.**  $^1\text{H}$ - $^{11}\text{B}$  HSQC NMR spectrum of **1** in  $\text{CDCl}_3$ . Note that in  $\text{CDCl}_3$  the  $^{11}\text{B}\{^1\text{H}\}$  peak at 38.14 ppm for six boron atoms, which is separated in  $\text{C}_6\text{D}_6$  in 4:2 ratio. Also, no correlation of  $^1\text{H}$  chemical shifts at  $\delta = -0.05$  and  $-2.59$  ppm with  $^{11}\text{B}$  chemical shifts is observed as these two  $^1\text{H}$  signals are very weak.

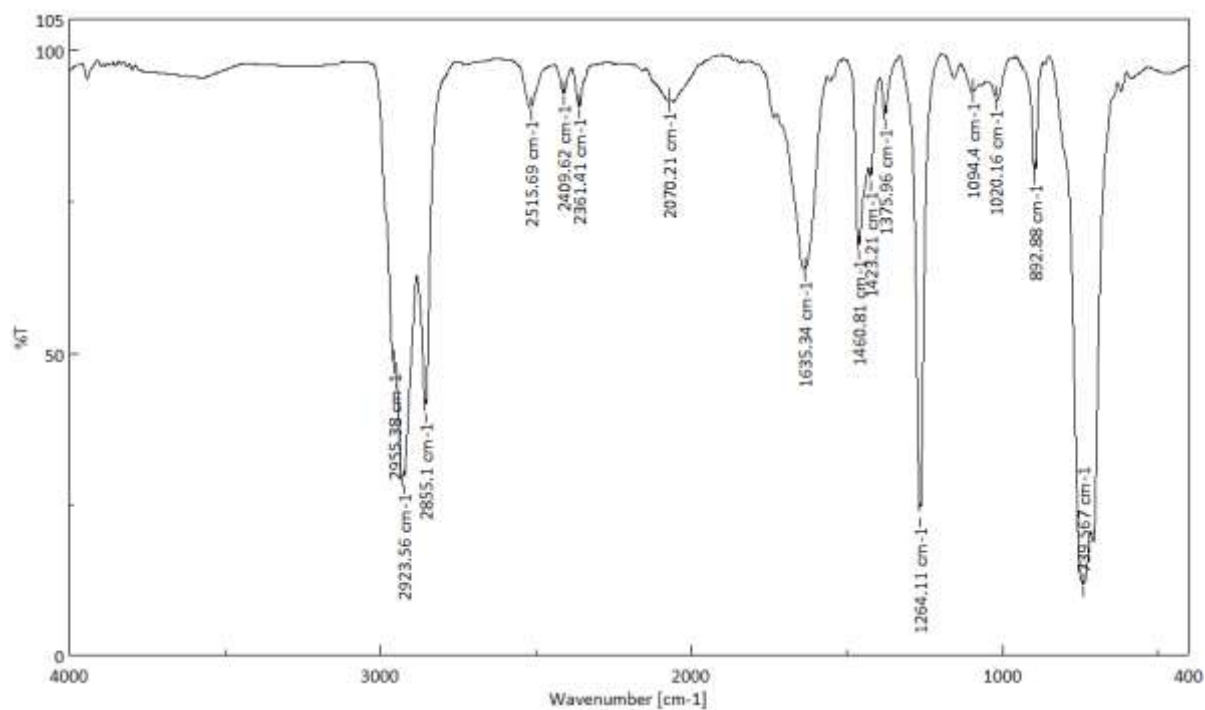

**Figure S10.** IR spectrum of **1**.

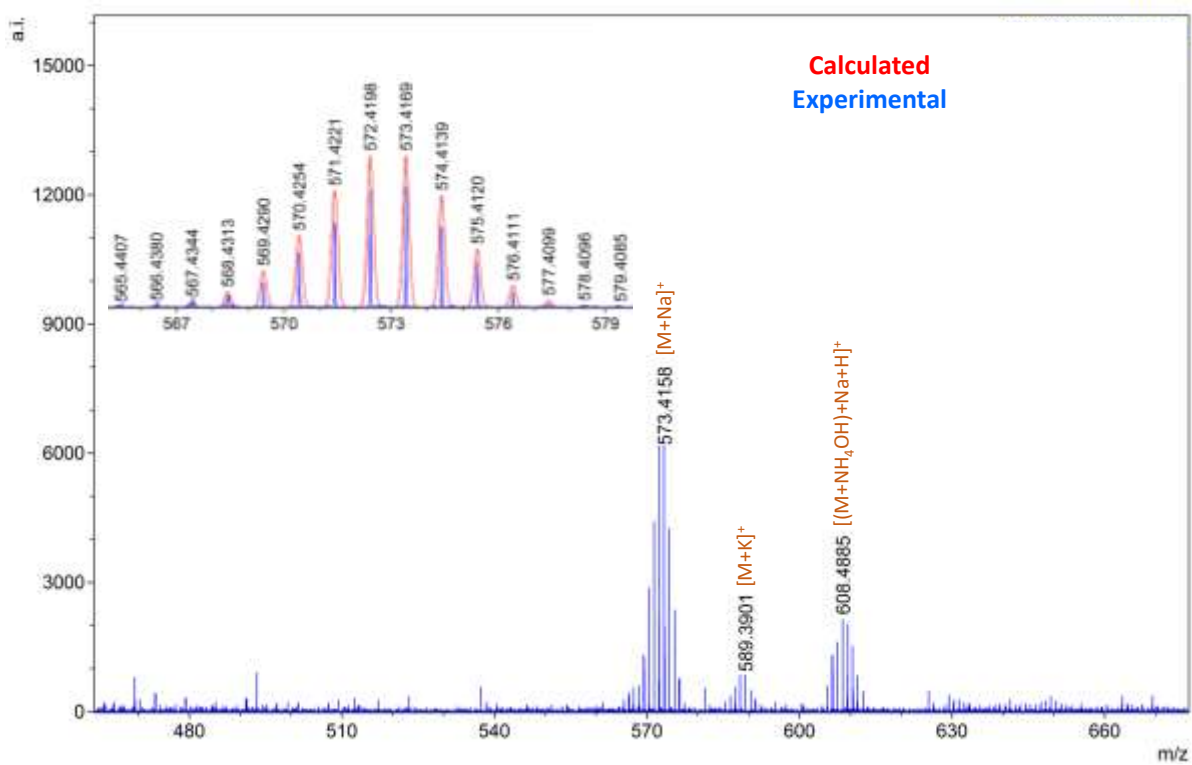

Figure S11. ESI-MS spectrum of 2.

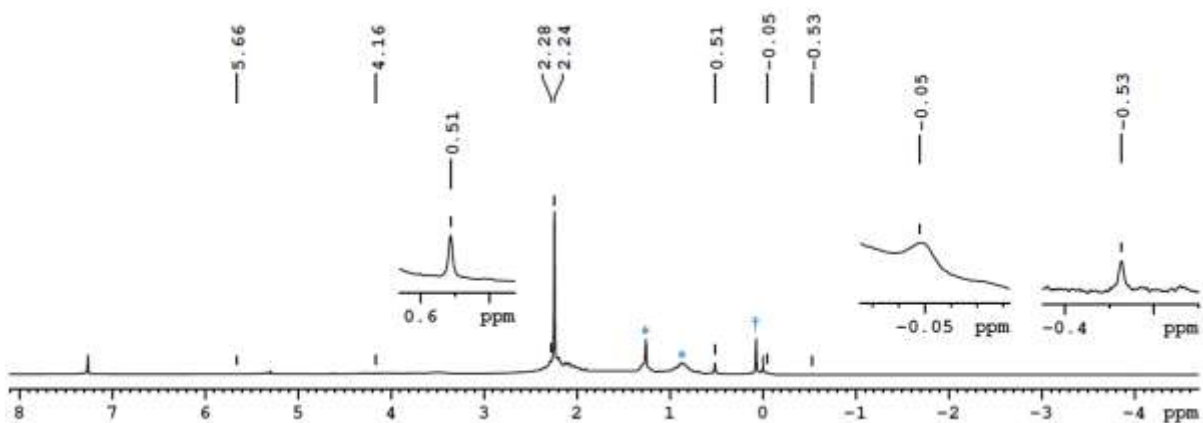

Figure S12. <sup>1</sup>H NMR spectrum of 2 in CDCl<sub>3</sub> (\*Grease, †Silicon grease).

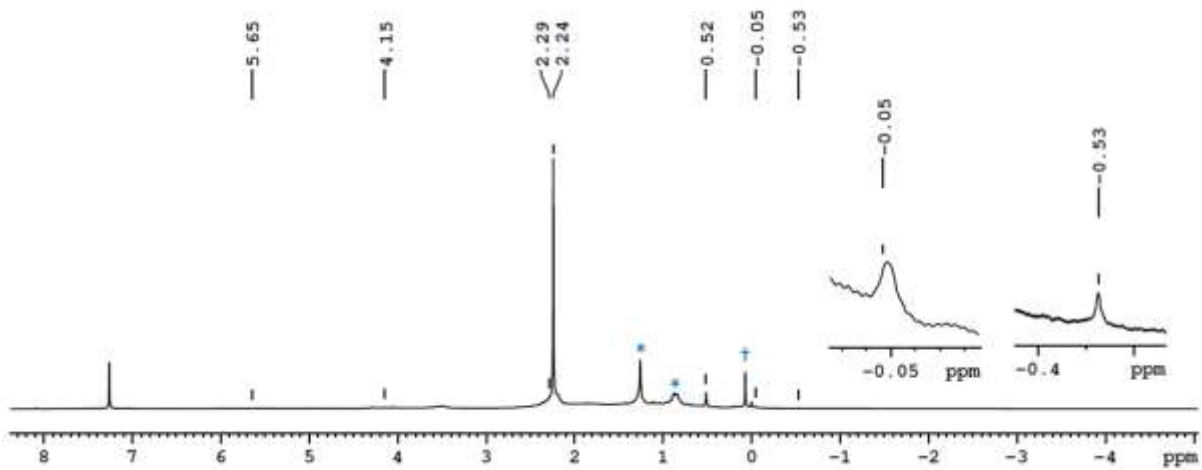

Figure S13.  $^1\text{H}\{^{11}\text{B}\}$  NMR spectrum of **2** in  $\text{CDCl}_3$  (\*Grease, †Silicon grease).

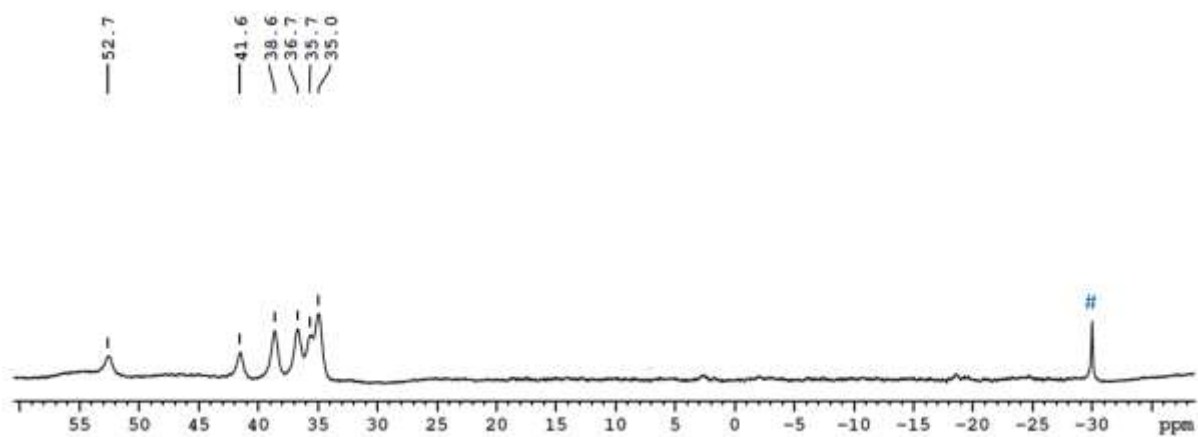

Figure S14.  $^{11}\text{B}\{^1\text{H}\}$  NMR spectrum of **2** in  $\text{C}_6\text{D}_6.3$  (# $[\text{Bu}_4\text{N}(\text{B}_3\text{H}_8)]$ , external reference for the  $^{11}\text{B}\{^1\text{H}\}$  NMR analysis)

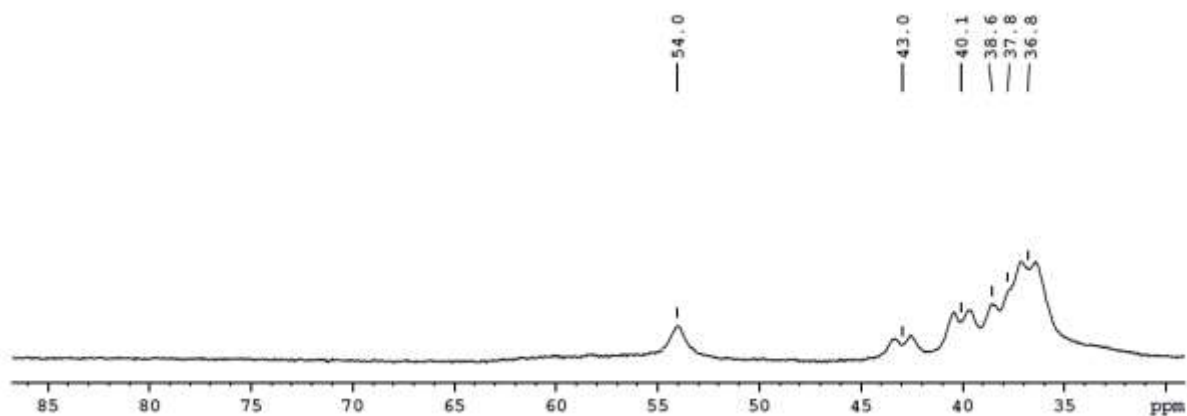

**Figure S15.**  $^{11}\text{B}$  NMR spectrum of **2** in  $\text{CDCl}_3$ .<sup>3</sup> Note that the chemical shifts at  $\delta = 54.0$  and  $38.6$  ppm did not show any coupling as the peak at  $\delta = 54.0$  ppm corresponds to boron atom attached to methyl and the peak at  $\delta = 38.6$  ppm corresponds to bare boron atoms. Also, the chemical shifts at  $\delta = 37.8$  and  $36.8$  ppm are merged.

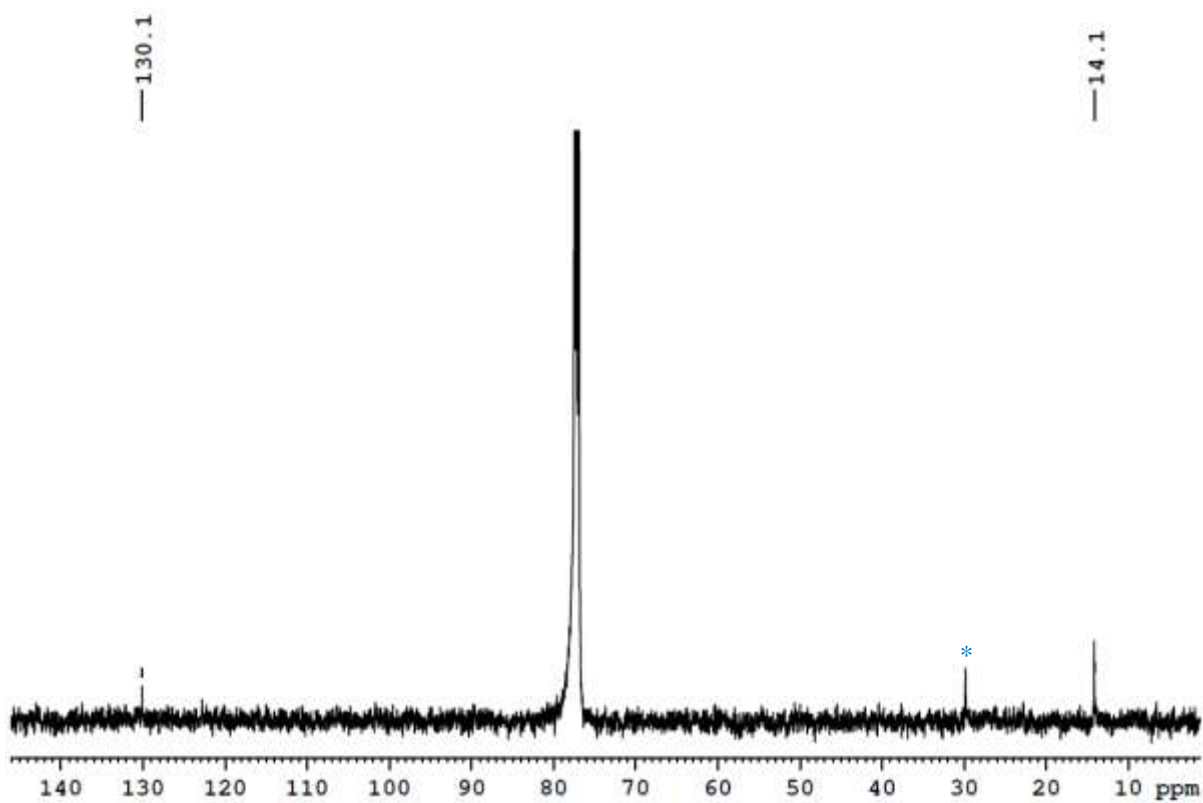

**Figure S16.**  $^{13}\text{C}\{^1\text{H}\}$  NMR spectrum of **2** in  $\text{CDCl}_3$ . (\*Grease)

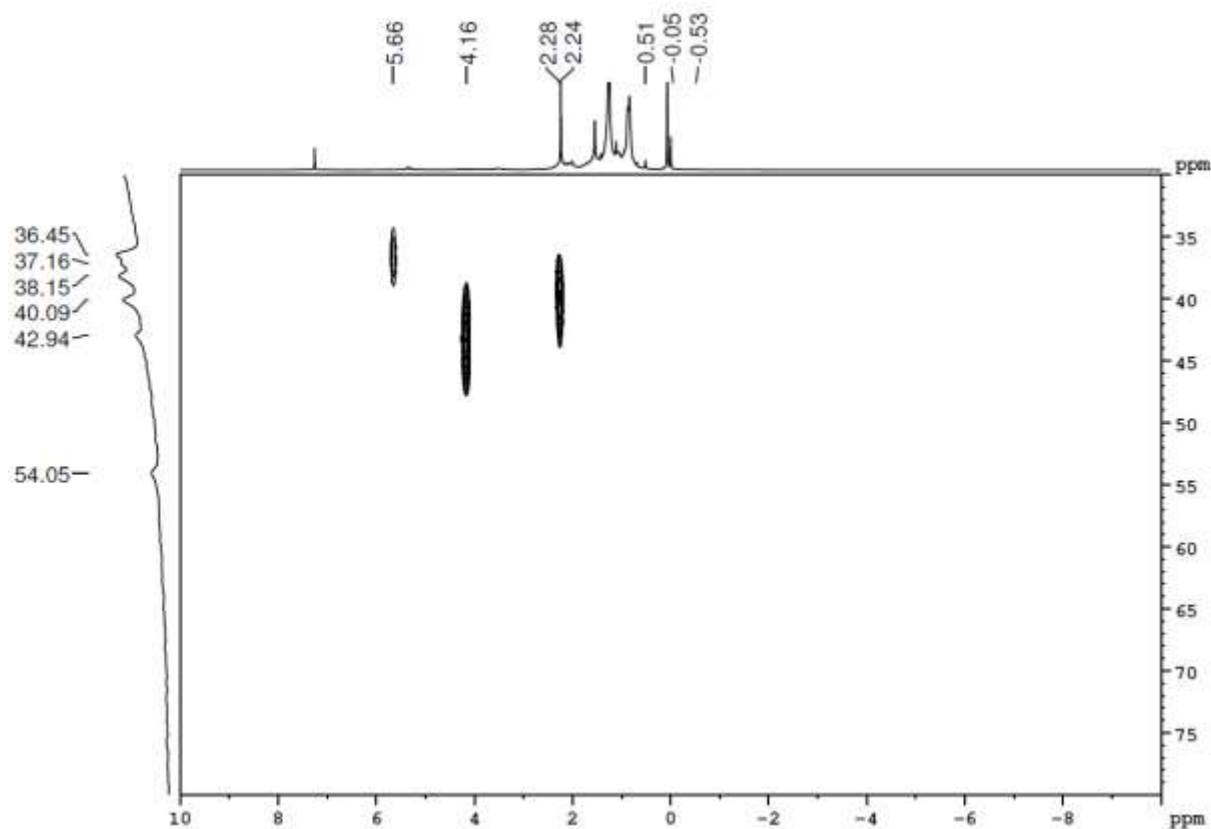

**Figure S17.**  $^1\text{H}$ - $^{11}\text{B}$  HSQC NMR spectrum of **2** in  $\text{CDCl}_3$ . Note that no correlation of  $^1\text{H}$  chemical shifts at  $\delta = -0.05$  and  $-0.53$  ppm with  $^{11}\text{B}$  chemical shifts is observed as these two  $^1\text{H}$  signals are very weak.

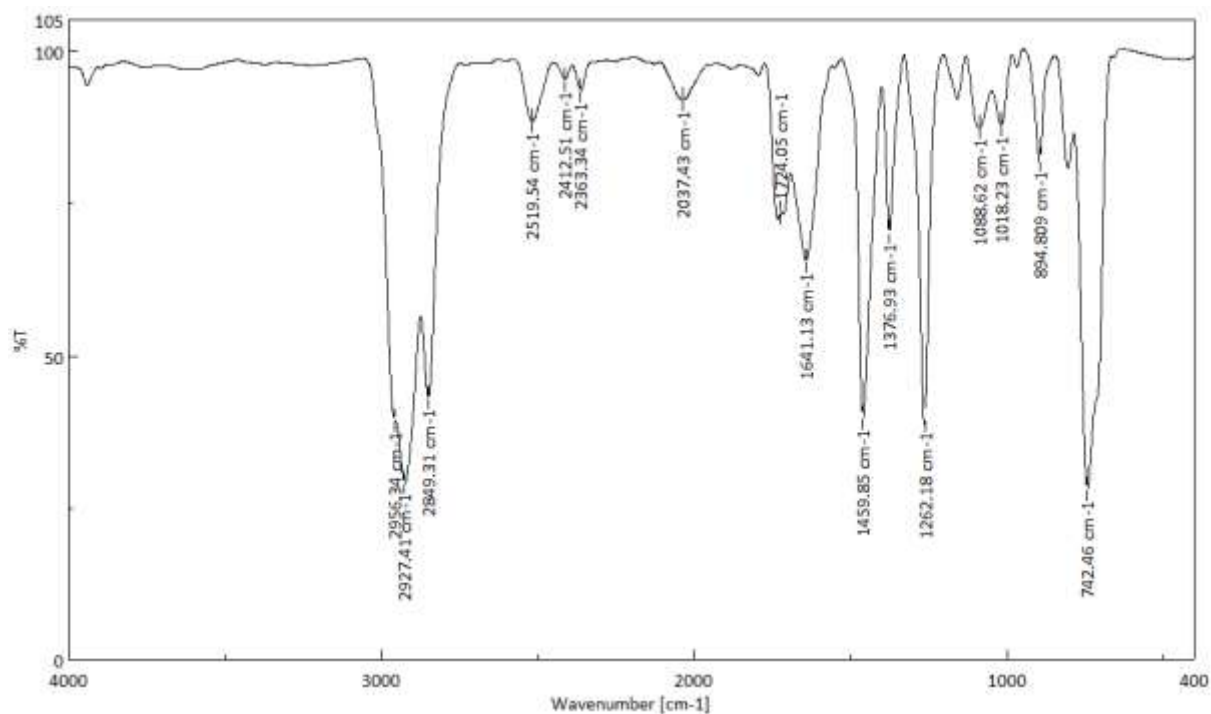

**Figure S18.** IR spectrum of **2**.

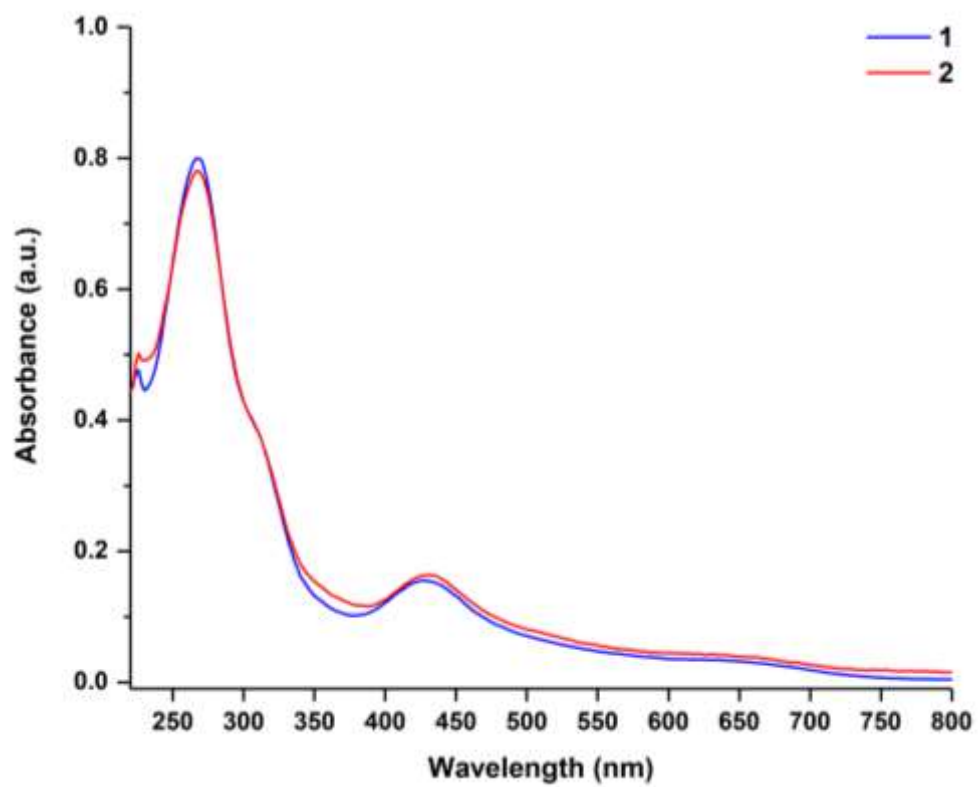

Figure S19. Combined UV-vis spectra of **1** and **2** in CH<sub>2</sub>Cl<sub>2</sub>.

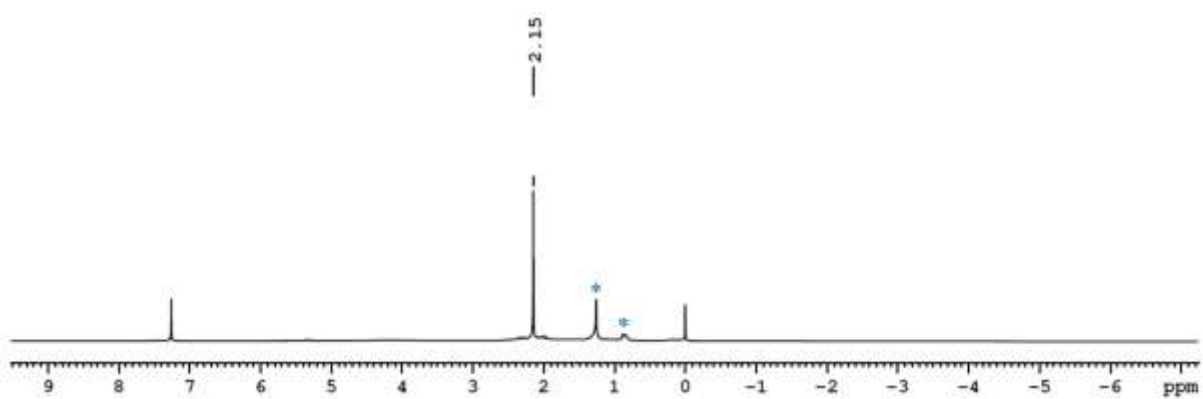

Figure S20. <sup>1</sup>H NMR spectrum of **3** in CDCl<sub>3</sub>. (\*Grease)

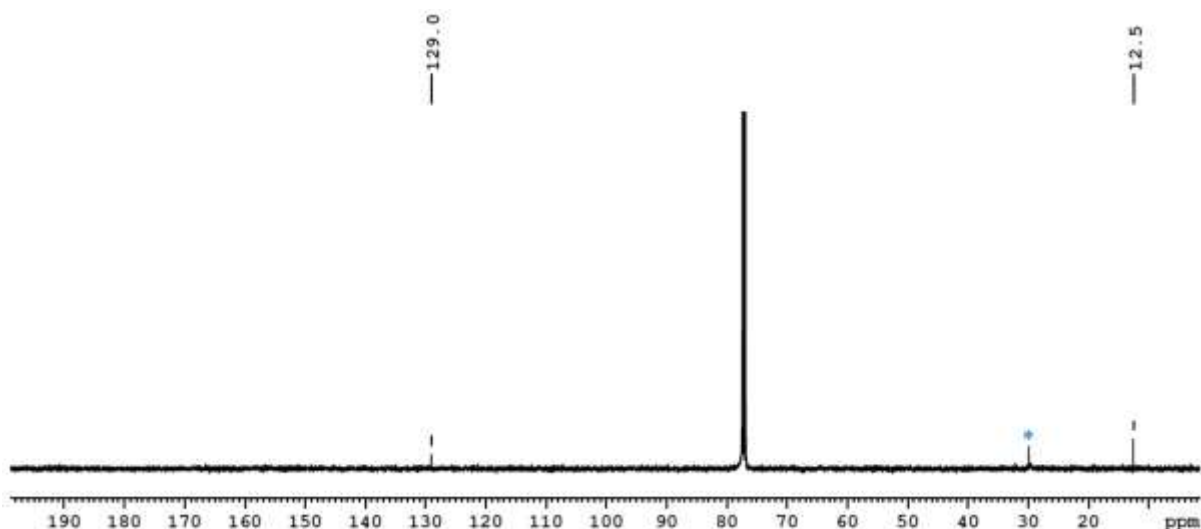

**Figure S21.**  $^{13}\text{C}\{^1\text{H}\}$  NMR spectrum of **3** in  $\text{CDCl}_3$ . (\*Grease)

## I.2 X-ray Analysis Details

Suitable X-ray quality crystals of **1**, **2** and **3** were grown by slow diffusion of a hexane-dichloromethane solution at 3 °C. Crystal data were obtained and integrated using a Bruker D8 VENTURE diffractometer with PHOTON II detector (for **1**, **2** and **3**), with graphite monochromated  $\text{MoK}\alpha$  ( $\lambda = 0.71073 \text{ \AA}$ ) radiation at 296 K for **1**,  $\text{CuK}\alpha$  ( $\lambda = 1.54178 \text{ \AA}$ ) radiation at 296 K for **2**, and  $\text{CuK}\alpha$  ( $\lambda = 1.54178 \text{ \AA}$ ) radiation at 297 K for **3**. The structures were solved using SIR92<sup>6</sup> and refined with SHELXT-2018/2.<sup>7</sup> Using Olex2<sup>8</sup> the molecular structure was drawn. Crystallographic data have been deposited with the Cambridge Crystallographic Data Center as supplementary publication no CCDC-2195922 (**1**), 2257775 (**2**) and 2257779 (**3**). These data can be obtained free of charge from The Cambridge Crystallographic Data Centre via [www.ccdc.cam.ac.uk/data\\_request/cif](http://www.ccdc.cam.ac.uk/data_request/cif).

Crystal data for **1**:  $\text{C}_{20}\text{H}_{48}\text{B}_{14}\text{Ti}_2$ ,  $M_r = 535.72$ , Monoclinic, space group  $P2_1/n$ ,  $a = 8.5861(3) \text{ \AA}$ ,  $b = 33.4748(13) \text{ \AA}$ ,  $c = 10.7145(4) \text{ \AA}$ ,  $\alpha = 90^\circ$ ,  $\beta = 106.9810(10)^\circ$ ,  $\gamma = 90^\circ$ ,  $V = 2945.28(19) \text{ \AA}^3$ ,  $Z = 4$ ,  $\rho_{\text{calcd}} = 1.208 \text{ g/cm}^3$ ,  $\mu = 0.553 \text{ mm}^{-1}$ ,  $F(000) = 1128.0$ ,  $R_1 = 0.0726$ ,  $wR_2 = 0.1738$ , 5171 independent reflections [ $2\theta \leq 49.992^\circ$ ] and 397 parameters.

Crystal data for **2**:  $\text{C}_{21}\text{H}_{50}\text{B}_{14}\text{Ti}_2$ ,  $M_r = 549.75$ , Monoclinic, space group  $P2_1/n$ ,  $a = 10.4697(7) \text{ \AA}$ ,  $b = 15.0305(11) \text{ \AA}$ ,  $c = 20.0992(15) \text{ \AA}$ ,  $\alpha = 90^\circ$ ,  $\beta = 103.344(4)^\circ$ ,  $\gamma = 90^\circ$ ,  $V = 3077.5(4) \text{ \AA}^3$ ,  $Z = 4$ ,  $\rho_{\text{calcd}} = 1.187 \text{ g/cm}^3$ ,  $\mu = 4.458 \text{ mm}^{-1}$ ,  $F(000) = 1160.0$ ,  $R_1 = 0.0645$ ,  $wR_2 = 0.2229$ , 5704 independent reflections [ $2\theta \leq 139.376^\circ$ ] and 402 parameters.

Crystal data for **3**:  $\text{C}_{40}\text{H}_{60}\text{Cl}_4\text{O}_4\text{Ti}_4$ ,  $M_r = 938.28$ , Tetragonal, space group  $I-42m$ ,  $a = 16.8466(3) \text{ \AA}$ ,  $b = 16.8466(3) \text{ \AA}$ ,  $c = 8.9685(3) \text{ \AA}$ ,  $\alpha = 90^\circ$ ,  $\beta = 90^\circ$ ,  $\gamma = 90^\circ$ ,  $V = 2545.33(12) \text{ \AA}^3$ ,  $Z = 2$ ,  $\rho_{\text{calcd}} = 1.224 \text{ g/cm}^3$ ,  $\mu = 7.340 \text{ mm}^{-1}$ ,  $F(000) = 976.0$ ,  $R_1 = 0.0462$ ,  $wR_2 = 0.1296$ , 1275 independent reflections [ $2\theta \leq 140.906^\circ$ ] and 66 parameters.

## II Computational Details

All molecules were fully optimized using the *Gaussian 09*<sup>9</sup> program employing the PBE1PBE functional<sup>10</sup> in conjunction with a def2-tzvp basis set from EMSL Basis Set Exchange Library.<sup>11</sup> The model compounds were fully optimized in gaseous state (no solvent effect) starting from the X-ray crystallographic coordinates. Frequency calculations were performed at the same level of theory to verify the nature of the stationary states and the absence of any imaginary frequency to confirm that all structures represent minima on the potential energy hypersurface. Further, the gauge including atomic orbital (GIAO)<sup>12-14</sup> method was employed to compute the  $^{11}\text{B}$  chemical shifts. The NMR chemical shifts were calculated using the hybrid Becke–Lee–Yang–Parr (B3LYP) functional<sup>15</sup> and the def2-TZVP basis set on the PBE1PBE/def2-TZVP optimized



geometries. The  $^{11}\text{B}$  NMR chemical shifts were calculated relative to  $\text{B}_2\text{H}_6$  (B3LYP B shielding constant 84.05 ppm) and converted to the usual  $[\text{BF}_3\cdot\text{OEt}_2]$  scale using the experimental  $\delta$  ( $^{11}\text{B}$ ) value of  $\text{B}_2\text{H}_6$ , 16.6 ppm.<sup>16</sup> Natural bonding analyses were performed with the natural bond orbital (NBO) partitioning scheme<sup>17</sup> as implemented in the Gaussian 09 suite of programs. Wiberg bond indexes (WBI)<sup>18</sup> were obtained from a natural bond orbital analysis. In order to understand the nature of bonding in the synthesised molecules in greater detail, the topological properties of the resultant electron density,  $\rho$ , obtained from the wave functions of all the optimized structures were analyzed with the quantum theory of atoms in molecules (QTAIM).<sup>19</sup> The QTAIM analysis was carried out utilizing the Multiwfn V.3.4 package<sup>20</sup> whereas the wave functions were generated with Gaussian09 at the same level of theory as for geometry optimization. All the optimized structures and orbital graphics were generated using the Gaussview<sup>21</sup>, and Chemcraft<sup>22</sup> visualization programs.

**Table S1.** Bond parameters of  $[(\text{Cp}^*\text{Ti})_2\text{B}_{14}\text{H}_{18}]$  (**1**) and  $[(\text{Cp}^*\text{Ti})_2\text{B}_{14}\text{H}_{17}\text{Me}]$  (**2**) are compared with their optimized values. All distances are in Å.  $\Theta$  are the dihedral angles.

| $[(\text{Cp}^*\text{Ti})_2\text{B}_{14}\text{H}_{18}]$ ( <b>1</b> ) |                   |                |       | $[(\text{Cp}^*\text{Ti})_2\text{B}_{14}\text{H}_{17}\text{Me}]$ ( <b>2</b> ) |                   |                |       |
|---------------------------------------------------------------------|-------------------|----------------|-------|------------------------------------------------------------------------------|-------------------|----------------|-------|
|                                                                     | Expt.             | Cal.           | WBI   |                                                                              | Expt.             | Cal.           | WBI   |
| <b>Ti1-B1</b>                                                       | 2.309(5)          | 2.284          | 0.688 | <b>Ti2-B9</b>                                                                | 2.306(5)          | 2.283          | 0.456 |
| <b>Ti1-B12</b>                                                      | 2.300(4)          | 2.286          | 0.685 | <b>Ti2-B10</b>                                                               | 2.288(5)          | 2.287          | 0.453 |
| <b>Ti1-B2</b>                                                       | 2.500(5)          | 2.485          | 0.556 | <b>Ti2-B12</b>                                                               | 2.498(7)          | 2.481          | 0.299 |
| <b>Ti1-B14</b>                                                      | 2.490(5)          | 2.482          | 0.556 | <b>Ti2-B13</b>                                                               | 2.491(7)          | 2.487          | 0.296 |
| <b>Ti1-B5</b>                                                       | 2.429(5)          | 2.404          | 0.602 | <b>Ti2-B3</b>                                                                | 2.417(6)          | 2.401          | 0.404 |
| <b>Ti1-B11</b>                                                      | 2.422(5)          | 2.408          | 0.599 | <b>Ti2-B7</b>                                                                | 2.426(6)          | 2.406          | 0.399 |
| <b>Ti1-B8</b>                                                       | 2.426(5)          | 2.394          | 0.663 | <b>Ti2-B4</b>                                                                | 2.412(6)          | 2.391          | 0.466 |
| <b>Ti2-B1</b>                                                       | 2.299(5)          | 2.287          | 0.685 | <b>Ti1-B9</b>                                                                | 2.288(5)          | 2.284          | 0.456 |
| <b>Ti2-B12</b>                                                      | 2.292(5)          | 2.284          | 0.688 | <b>Ti1-B10</b>                                                               | 2.308(5)          | 2.288          | 0.453 |
| <b>Ti2-B3</b>                                                       | 2.503(6)          | 2.482          | 0.556 | <b>Ti1-B11</b>                                                               | 2.512(7)          | 2.481          | 0.300 |
| <b>Ti2-B13</b>                                                      | 2.502(5)          | 2.485          | 0.556 | <b>Ti1-B14</b>                                                               | 2.516(7)          | 2.486          | 0.296 |
| <b>Ti2-B4</b>                                                       | 2.437(5)          | 2.408          | 0.599 | <b>Ti1-B2</b>                                                                | 2.393(6)          | 2.401          | 0.404 |
| <b>Ti2-B10</b>                                                      | 2.422(5)          | 2.404          | 0.602 | <b>Ti1-B8</b>                                                                | 2.416(6)          | 2.406          | 0.399 |
| <b>Ti2-B7</b>                                                       | 2.435(5)          | 2.394          | 0.663 | <b>Ti1-B1</b>                                                                | 2.417(6)          | 2.391          | 0.467 |
| <b>B1-B12</b>                                                       | 1.926(6)          | 1.919          | 0.547 | <b>B9-B10</b>                                                                | 1.931(8)          | 1.919          | 0.471 |
| <b>B2-B3</b>                                                        | 1.717(8)          | 1.707          | 0.802 | <b>B11-B12</b>                                                               | 1.714(9)          | 1.708          | 0.653 |
| <b>B13-B14</b>                                                      | 1.716(8)          | 1.707          | 0.802 | <b>B13-B14</b>                                                               | 1.722(10)         | 1.707          | 0.655 |
| <b>B4-B5</b>                                                        | 1.778(7)          | 1.763          | 0.675 | <b>B2-B3</b>                                                                 | 1.787(8)          | 1.763          | 0.551 |
| <b>B10-B11</b>                                                      | 1.796(7)          | 1.763          | 0.675 | <b>B7-B8</b>                                                                 | 1.812(9)          | 1.759          | 0.555 |
| <b>B1-B2</b>                                                        | 1.776(7)          | 1.755          | 0.696 | <b>B9-B12</b>                                                                | 1.777(9)          | 1.755          | 0.566 |
| <b>B1-B3</b>                                                        | 1.781(7)          | 1.755          | 0.699 | <b>B9-B11</b>                                                                | 1.768(8)          | 1.755          | 0.566 |
| <b>B12-B14</b>                                                      | 1.774(7)          | 1.755          | 0.699 | <b>B10-B13</b>                                                               | 1.774(8)          | 1.754          | 0.565 |
| <b>B12-B13</b>                                                      | 1.772(6)          | 1.755          | 0.696 | <b>B10-B14</b>                                                               | 1.763(8)          | 1.754          | 0.565 |
| <b>B1-B5</b>                                                        | 1.765(6)          | 1.752          | 0.676 | <b>B3-B9</b>                                                                 | 1.764(8)          | 1.753          | 0.558 |
| <b>B1-B4</b>                                                        | 1.757(6)          | 1.753          | 0.676 | <b>B2-B9</b>                                                                 | 1.761(8)          | 1.753          | 0.558 |
| <b>B11-B12</b>                                                      | 1.770(6)          | 1.753          | 0.675 | <b>B7-B10</b>                                                                | 1.782(8)          | 1.749          | 0.561 |
| <b>B10-B12</b>                                                      | 1.772(6)          | 1.752          | 0.676 | <b>B8-B10</b>                                                                | 1.767(8)          | 1.749          | 0.560 |
| <b>B5-B6</b>                                                        | 1.776(7)          | 1.762          | 0.650 | <b>B3-B6</b>                                                                 | 1.755(10)         | 1.759          | 0.533 |
| <b>B5-B8</b>                                                        | 1.783(7)          | 1.773          | 0.671 | <b>B3-B4</b>                                                                 | 1.753(9)          | 1.772          | 0.588 |
| <b>B8-B11</b>                                                       | 1.777(7)          | 1.773          | 0.671 | <b>B4-B7</b>                                                                 | 1.764(9)          | 1.771          | 0.589 |
| <b>B9-B11</b>                                                       | 1.785(7)          | 1.763          | 0.649 | <b>B5-B7</b>                                                                 | 1.763(8)          | 1.776          | 0.518 |
| <b>B6-B8</b>                                                        | 1.788(7)          | 1.781          | 0.635 | <b>B4-B6</b>                                                                 | 1.758(9)          | 1.778          | 0.511 |
| <b>B8-B9</b>                                                        | 1.797(7)          | 1.781          | 0.634 | <b>B4-B5</b>                                                                 | 1.799(9)          | 1.795          | 0.497 |
| <b>B6-B9</b>                                                        | 1.765(8)          | 1.765          | 0.636 | <b>B5-B6</b>                                                                 | 1.795(10)         | 1.776          | 0.521 |
| <b>B6-B7</b>                                                        | 1.789(7)          | 1.782          | 0.634 | <b>B1-B6</b>                                                                 | 1.771(9)          | 1.779          | 0.510 |
| <b>B7-B9</b>                                                        | 1.787(7)          | 1.781          | 0.635 | <b>B1-B5</b>                                                                 | 1.789(8)          | 1.794          | 0.497 |
| <b>B7-B10</b>                                                       | 1.776(7)          | 1.773          | 0.671 | <b>B1-B8</b>                                                                 | 1.756(8)          | 1.770          | 0.590 |
| <b>B4-B7</b>                                                        | 1.785(7)          | 1.773          | 0.671 | <b>B1-B2</b>                                                                 | 1.778(9)          | 1.772          | 0.588 |
|                                                                     |                   |                |       | <b>B5-C21</b>                                                                | 1.592(8)          | 1.590          | 0.965 |
| <b><math>\Theta</math> (Ti1-B1-B12-Ti2)</b>                         | 175.7(2) $^\circ$ | 176.7 $^\circ$ | -     | <b><math>\Theta</math> (Ti1-B9-B10-Ti2)</b>                                  | 176.4(2) $^\circ$ | 176.9 $^\circ$ | -     |

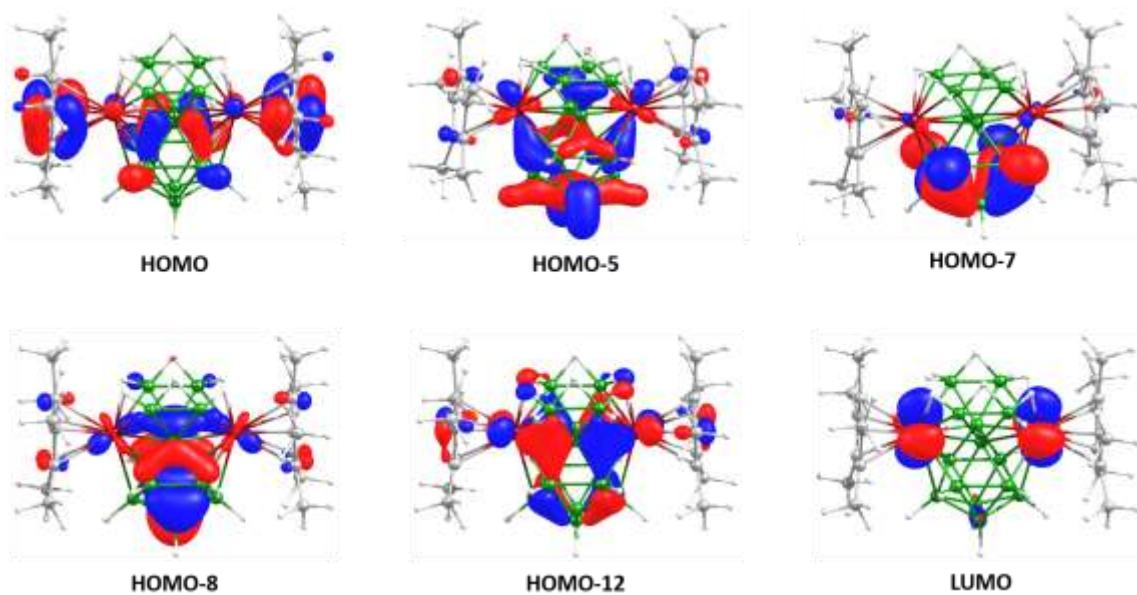

Figure S22. Selected molecular orbitals of **1** (isocontour values:  $\pm 0.043$  [ $e \cdot \text{bohr}^{-3}]^{1/2}$ ).

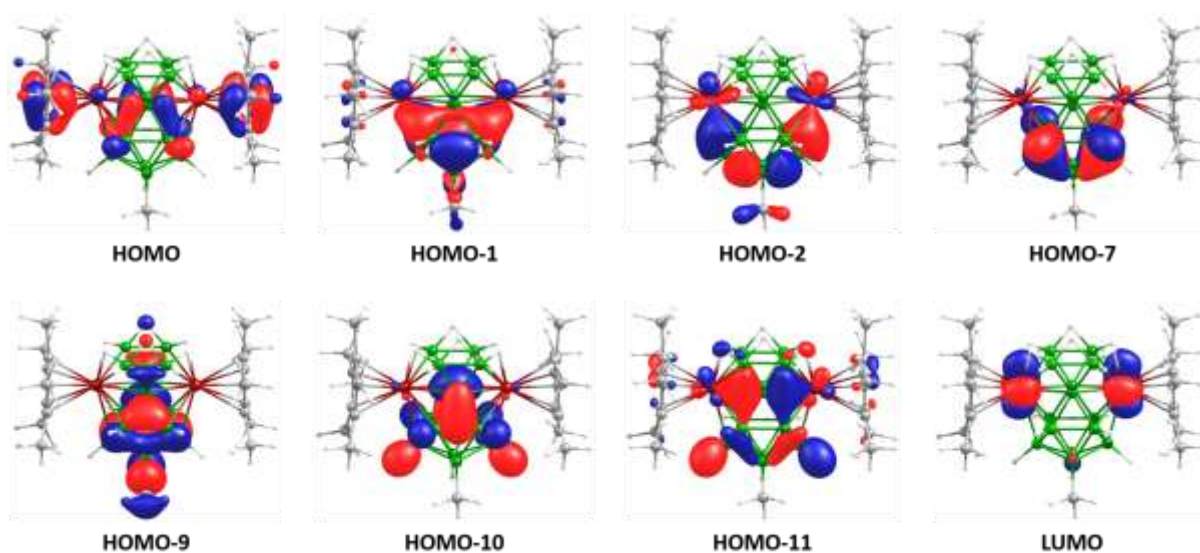

Figure S23. Selected molecular orbitals of **2** (isocontour values:  $\pm 0.043$  [ $e \cdot \text{bohr}^{-3}]^{1/2}$ ).

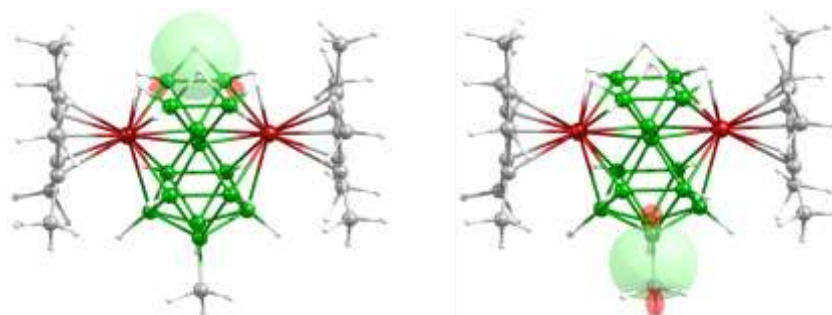

Figure S24. B-H-B (left) and B-Me (right) interactions in **2**, obtained from an NBO analysis (isocontour values:  $\pm 0.043$  [ $e \cdot \text{bohr}^{-3}]^{1/2}$ ).

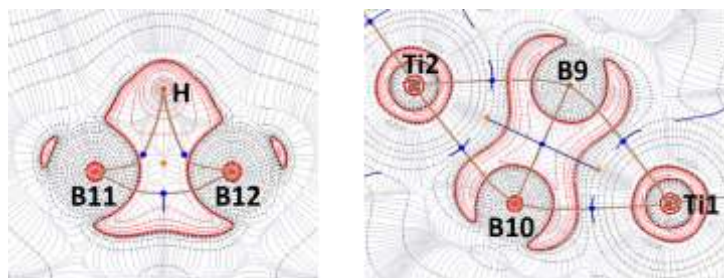

**Figure S25.** Contour-line diagram of the Laplacian of the electron density of **2** in the B11–H–B12 (left) and Ti1–B9–B10–Ti2 (right) planes. The solid brown lines are bond paths, whereas blue dots indicate the bond-critical points (BCP). Solid red lines indicate the areas of charge concentration ( $\nabla^2\rho(r) < 0$ ), while dashed black lines show the areas of charge depletion ( $\nabla^2\rho(r) > 0$ ).

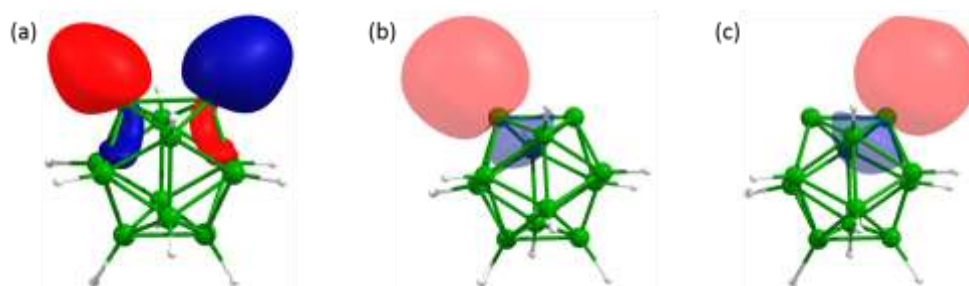

**Figure S26.** (a) HOMO of  $[\text{B}_{12}\text{H}_{10}]^{4-}$  depicting localized orbitals on two adjacent bare boron atoms (isocontour values:  $\pm 0.043$  [ $\text{e}\cdot\text{bohr}^{-3}$ ] $^{1/2}$ ); (b) and (c) NBO analysis of  $[\text{B}_{12}\text{H}_{10}]^{4-}$  depicted lone pairs on two adjacent bare boron atoms.

**Table S2.** Calculated natural charges ( $q_{Ti}$ , and  $q_B$ ), natural valence populations ( $Pop$ ) and HOMO–LUMO gaps ( $\Delta E_{H-L}$ ) of **1** and **2**.

| Compound | $q_{Ti}$ | $q_B$                | $Pop$ ( $Ti_{val}$ ) | $Pop$ ( $B_{val}$ )  | $\Delta E_{H-L}$ (eV) |
|----------|----------|----------------------|----------------------|----------------------|-----------------------|
| <b>1</b> | 0.391    | -0.245               | 3.506                | 3.217                | 3.455                 |
|          | 0.391    | -0.251               | 3.506                | 3.223                |                       |
|          |          | -0.181               |                      | 3.152                |                       |
|          |          | -0.219               |                      | 3.184                |                       |
|          |          | -0.215               |                      | 3.179                |                       |
|          |          | -0.184               |                      | 3.147                |                       |
|          |          | -0.204               |                      | 3.167                |                       |
|          |          | -0.184               |                      | 3.147                |                       |
|          |          | -0.204               |                      | 3.167                |                       |
|          |          | -0.215               |                      | 3.179                |                       |
|          |          | -0.219               |                      | 3.184                |                       |
|          |          | -0.181               |                      | 3.151                |                       |
|          |          | -0.251               |                      | 3.223                |                       |
|          |          | -0.245               |                      | 3.217                |                       |
| <b>2</b> | 0.392    | -0.205               | 3.505                | 3.167                | 3.460                 |
|          | 0.392    | -0.219               | 3.505                | 3.184                |                       |
|          |          | -0.220               |                      | 3.185                |                       |
|          |          | -0.203               |                      | 3.166                |                       |
|          |          | -0.195               |                      | 3.156                |                       |
|          |          | -0.219               |                      | 3.183                |                       |
|          |          | -0.217               |                      | 3.180                |                       |
|          |          | -0.187               |                      | 3.158                |                       |
|          |          | -0.179               |                      | 3.149                |                       |
|          |          | -0.246               |                      | 3.219                |                       |
|          |          | -0.246               |                      | 3.219                |                       |
|          |          | -0.249               |                      | 3.221                |                       |
|          |          | -0.249               |                      | 3.221                |                       |
|          |          | 0.097 <sup>[a]</sup> |                      | 2.864 <sup>[a]</sup> |                       |

<sup>[a]</sup>Data is for B5 attached to methyl group in compound **2**.

### III Cartesian Coordinates of all Optimized Structures

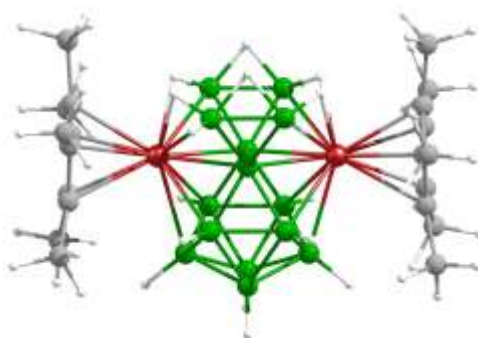

**Figure S27.** Optimized geometry of **1**.

Total energy = -2836.73489769 a.u.

Cartesian coordinates for the calculated structure **1** (in Å)

|   |                 |                 |                 |    |                 |                 |                 |
|---|-----------------|-----------------|-----------------|----|-----------------|-----------------|-----------------|
| C | -4.154998000000 | 0.695467000000  | -0.795999000000 | C  | 4.386920000000  | 2.062072000000  | -1.414586000000 |
| C | -4.120077000000 | -0.686347000000 | -1.109673000000 | H  | 4.435537000000  | 2.940142000000  | -0.773806000000 |
| C | -4.082435000000 | -1.419629000000 | 0.109620000000  | H  | 3.597608000000  | 2.231849000000  | -2.149475000000 |
| C | -4.107006000000 | -0.480324000000 | 1.178105000000  | H  | 5.337697000000  | 1.981155000000  | -1.952141000000 |
| C | -4.155338000000 | 0.821148000000  | 0.624317000000  | C  | 4.197065000000  | -0.786828000000 | -2.633193000000 |
| C | -4.355795000000 | 1.797724000000  | -1.776258000000 | H  | 3.823586000000  | -1.783171000000 | -2.869021000000 |
| H | -3.966812000000 | 1.536234000000  | -2.760352000000 | H  | 5.241172000000  | -0.737810000000 | -2.961791000000 |
| H | -3.857089000000 | 2.712251000000  | -1.457689000000 | H  | 3.631477000000  | -0.067251000000 | -3.227408000000 |
| H | -5.425171000000 | 2.009436000000  | -1.885314000000 | B  | -0.840495000000 | -1.454816000000 | -1.782257000000 |
| C | -4.221809000000 | -1.266772000000 | -2.479732000000 | B  | 0.866019000000  | -1.466005000000 | -1.759395000000 |
| H | -3.825751000000 | -2.281645000000 | -2.523542000000 | B  | 0.009766000000  | -0.158501000000 | -0.960369000000 |
| H | -3.681703000000 | -0.669042000000 | -3.214985000000 | B  | -0.866986000000 | 1.267685000000  | -1.481020000000 |
| H | -5.270461000000 | -1.306585000000 | -2.793258000000 | H  | -1.481276000000 | 1.283293000000  | -2.510352000000 |
| C | -4.176418000000 | -2.903858000000 | 0.241414000000  | B  | 0.895944000000  | 1.266841000000  | -1.461883000000 |
| H | -5.224560000000 | -3.220648000000 | 0.223189000000  | H  | 1.532432000000  | 1.280816000000  | -2.479383000000 |
| H | -3.746290000000 | -3.256343000000 | 1.179932000000  | B  | 0.009411000000  | 2.675262000000  | -0.882103000000 |
| H | -3.668166000000 | -3.421728000000 | -0.573905000000 | H  | 0.015908000000  | 3.701657000000  | -1.488577000000 |
| C | -4.194617000000 | -0.785939000000 | 2.634508000000  | B  | 1.432248000000  | 2.088677000000  | 0.015274000000  |
| H | -3.627998000000 | -0.066586000000 | 3.228022000000  | H  | 2.369371000000  | 2.820916000000  | 0.025859000000  |
| H | -3.821481000000 | -1.782442000000 | 2.870178000000  | B  | -0.009293000000 | 2.674557000000  | 0.882946000000  |
| H | -5.238381000000 | -0.736251000000 | 2.964077000000  | H  | -0.015824000000 | 3.700455000000  | 1.490254000000  |
| C | -4.386378000000 | 2.062469000000  | 1.414757000000  | B  | -1.432097000000 | 2.088623000000  | -0.014903000000 |
| H | -5.338482000000 | 1.982773000000  | 1.950171000000  | H  | -2.369258000000 | 2.820798000000  | -0.025192000000 |
| H | -4.432297000000 | 2.940709000000  | 0.774032000000  | B  | -0.895965000000 | 1.265612000000  | 1.461643000000  |
| H | -3.598466000000 | 2.230955000000  | 2.151441000000  | H  | -1.532046000000 | 1.278885000000  | 2.479378000000  |
| C | 4.082601000000  | -1.419608000000 | -0.108120000000 | B  | 0.867103000000  | 1.266420000000  | 1.480789000000  |
| C | 4.119026000000  | -0.685758000000 | 1.110895000000  | H  | 1.480975000000  | 1.281369000000  | 2.510343000000  |
| C | 4.154211000000  | 0.695894000000  | 0.796674000000  | B  | -0.009686000000 | -0.159246000000 | 0.958899000000  |
| C | 4.155833000000  | 0.821012000000  | -0.623670000000 | B  | -0.865967000000 | -1.467517000000 | 1.756687000000  |
| C | 4.108242000000  | -0.480778000000 | -1.176944000000 | B  | 0.840578000000  | -1.456298000000 | 1.779511000000  |
| C | 4.176803000000  | -2.903884000000 | -0.239196000000 | Ti | -2.073331000000 | -0.217613000000 | -0.019397000000 |
| H | 3.747922000000  | -3.256748000000 | -1.178147000000 | Ti | 2.073347000000  | -0.217797000000 | 0.017500000000  |
| H | 3.667505000000  | -3.421455000000 | 0.575660000000  | H  | 0.007627000000  | -2.499697000000 | -1.740664000000 |
| H | 5.224926000000  | -3.220649000000 | -0.219477000000 | H  | 1.332078000000  | -1.395305000000 | -2.853287000000 |
| C | 4.219570000000  | -1.265637000000 | 2.481253000000  | H  | -1.276817000000 | -1.377647000000 | -2.887911000000 |
| H | 3.822666000000  | -2.280164000000 | 2.525320000000  | H  | -1.699860000000 | -1.893806000000 | 0.940081000000  |
| H | 3.679533000000  | -0.667088000000 | 3.215886000000  | H  | 1.703431000000  | -1.880949000000 | 0.990367000000  |
| H | 5.268031000000  | -1.306134000000 | 2.795342000000  | H  | 1.276259000000  | -1.380489000000 | 2.885494000000  |
| C | 4.354267000000  | 1.798252000000  | 1.776946000000  | H  | -1.331476000000 | -1.398084000000 | 2.850881000000  |
| H | 5.423761000000  | 2.007531000000  | 1.889431000000  | H  | -0.007567000000 | -2.501228000000 | 1.736391000000  |
| H | 3.961335000000  | 1.538233000000  | 2.759867000000  | H  | -1.703076000000 | -1.880288000000 | -0.993273000000 |
| H | 3.858622000000  | 2.713699000000  | 1.456310000000  | H  | 1.699592000000  | -1.893450000000 | -0.943004000000 |

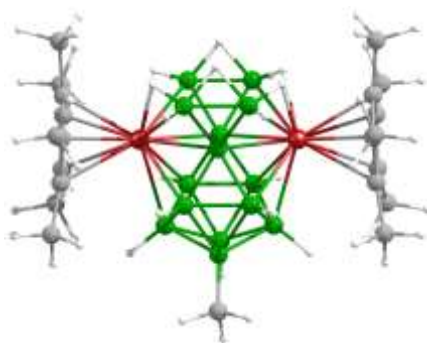

**Figure S28.** Optimized geometry of **2**

Total energy = -2876.02374292 a.u.

Cartesian coordinates for the calculated structure **2** (in Å)

|    |                 |                 |                 |   |                 |                 |                 |
|----|-----------------|-----------------|-----------------|---|-----------------|-----------------|-----------------|
| Ti | -2.073656000000 | -0.338060000000 | 0.023732000000  | C | 4.383453000000  | 2.230718000000  | 0.838945000000  |
| Ti | 2.073520000000  | -0.337735000000 | 0.024688000000  | H | 4.377803000000  | 2.924131000000  | 0.000674000000  |
| C  | -4.161504000000 | 0.345830000000  | -0.950004000000 | H | 3.623001000000  | 2.561511000000  | 1.548614000000  |
| C  | -4.154152000000 | 0.829321000000  | 0.391125000000  | H | 5.358708000000  | 2.302360000000  | 1.332573000000  |
| C  | -4.101399000000 | -0.287801000000 | 1.258408000000  | C | 4.182220000000  | -0.216081000000 | 2.745083000000  |
| C  | -4.080264000000 | -1.468568000000 | 0.464272000000  | H | 3.810874000000  | -1.122740000000 | 3.222633000000  |
| C  | -4.125235000000 | -1.070219000000 | -0.901219000000 | H | 5.223833000000  | -0.080356000000 | 3.056666000000  |
| C  | -4.235162000000 | -1.979201000000 | -2.078550000000 | H | 3.609967000000  | 0.626596000000  | 3.136660000000  |
| H  | -3.693459000000 | -1.592689000000 | -2.942857000000 | C | 0.000581000000  | 4.247560000000  | 0.502594000000  |
| H  | -3.847492000000 | -2.975313000000 | -1.863846000000 | H | -0.102763000000 | 4.894388000000  | -0.373023000000 |
| H  | -5.285291000000 | -2.088466000000 | -2.369929000000 | H | -0.820498000000 | 4.485354000000  | 1.185721000000  |
| C  | -4.169719000000 | -2.870096000000 | 0.971086000000  | H | 0.929576000000  | 4.528384000000  | 1.008310000000  |
| H  | -3.719692000000 | -2.974796000000 | 1.959387000000  | B | -1.430709000000 | 1.879503000000  | -0.597711000000 |
| H  | -5.217539000000 | -3.177107000000 | 1.055831000000  | B | -0.881261000000 | 0.688402000000  | -1.789416000000 |
| H  | -3.677814000000 | -3.579738000000 | 0.303587000000  | B | 0.882108000000  | 0.688005000000  | -1.789546000000 |
| C  | -4.181804000000 | -0.214377000000 | 2.745227000000  | B | 1.430890000000  | 1.879286000000  | -0.598014000000 |
| H  | -3.810474000000 | -1.120802000000 | 3.223226000000  | B | 0.000067000000  | 2.709995000000  | 0.097177000000  |
| H  | -3.609521000000 | 0.628488000000  | 3.136346000000  | B | 0.000449000000  | 2.199447000000  | -1.604060000000 |
| H  | -5.223410000000 | -0.078469000000 | 3.056756000000  | B | 0.879890000000  | 1.488163000000  | 1.038885000000  |
| C  | -4.383089000000 | 2.231462000000  | 0.837872000000  | B | -0.879917000000 | 1.487938000000  | 1.038793000000  |
| H  | -4.376978000000 | 2.924560000000  | -0.000640000000 | B | 0.000183000000  | -0.545604000000 | -0.909465000000 |
| H  | -5.358497000000 | 2.303470000000  | 1.331155000000  | B | -0.000031000000 | -0.019974000000 | 0.936216000000  |
| H  | -3.622788000000 | 2.562445000000  | 1.547589000000  | B | -0.853936000000 | -2.019223000000 | -1.333520000000 |
| C  | -4.373263000000 | 1.159097000000  | -2.178767000000 | B | 0.854184000000  | -2.019396000000 | -1.332977000000 |
| H  | -3.992299000000 | 0.652255000000  | -3.065326000000 | B | 0.852892000000  | -1.050939000000 | 2.070601000000  |
| H  | -5.444061000000 | 1.335452000000  | -2.329068000000 | B | -0.853780000000 | -1.050785000000 | 2.069792000000  |
| H  | -3.873862000000 | 2.124761000000  | -2.112097000000 | H | -0.000447000000 | -2.059752000000 | 2.325249000000  |
| C  | 4.124658000000  | -1.070040000000 | -0.901809000000 | H | 1.304809000000  | -0.681886000000 | 3.108823000000  |
| C  | 4.161216000000  | 0.346020000000  | -0.949898000000 | H | -1.306775000000 | -0.682037000000 | 3.107644000000  |
| C  | 4.154341000000  | 0.828816000000  | 0.391489000000  | H | -1.697149000000 | -1.678919000000 | 1.408709000000  |
| C  | 4.101747000000  | -0.288752000000 | 1.258226000000  | H | 1.696951000000  | -1.678801000000 | 1.410282000000  |
| C  | 4.080112000000  | -1.469083000000 | 0.463485000000  | H | -0.000138000000 | -3.012058000000 | -1.023717000000 |
| C  | 4.169303000000  | -2.870920000000 | 0.969501000000  | H | -1.703363000000 | -2.210063000000 | -0.445743000000 |
| H  | 3.719910000000  | -2.975955000000 | 1.958054000000  | H | -1.304749000000 | -2.247078000000 | -2.412288000000 |
| H  | 3.676636000000  | -3.579991000000 | 0.301955000000  | H | 1.305709000000  | -2.247676000000 | -2.411334000000 |
| H  | 5.217045000000  | -3.178440000000 | 1.053359000000  | H | 1.702650000000  | -2.210225000000 | -0.444338000000 |
| C  | 4.234171000000  | -1.978448000000 | -2.079607000000 | H | 1.505369000000  | 0.424072000000  | -2.779520000000 |
| H  | 3.846001000000  | -2.974481000000 | -1.865452000000 | H | -0.000256000000 | 3.029227000000  | -2.461478000000 |
| H  | 3.692681000000  | -1.591184000000 | -2.943706000000 | H | -1.505484000000 | 0.424559000000  | -2.778863000000 |
| H  | 5.284263000000  | -2.088078000000 | -2.370993000000 | H | -2.364312000000 | 2.591135000000  | -0.795961000000 |
| C  | 4.373107000000  | 1.159838000000  | -2.178266000000 | H | 1.498213000000  | 1.790019000000  | 2.022880000000  |
| H  | 3.873935000000  | 2.125585000000  | -2.111150000000 | H | -1.497519000000 | 1.790737000000  | 2.022882000000  |
| H  | 5.443949000000  | 1.336010000000  | -2.328481000000 | H | 2.364665000000  | 2.591065000000  | -0.794877000000 |
| H  | 3.992006000000  | 0.653496000000  | -3.065045000000 |   |                 |                 |                 |

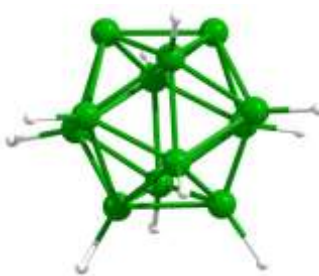

**Figure S29.** Optimized geometry of  $[B_{12}H_{10}]^{4-}$ .

Total energy = -303.38535783 a.u.

Cartesian coordinates for the calculated structure  $[B_{12}H_{10}]^{4-}$  (in Å)

|   |                 |                 |                 |   |                 |                 |                 |
|---|-----------------|-----------------|-----------------|---|-----------------|-----------------|-----------------|
| B | 0.000019000000  | 0.593502000000  | -1.695235000000 | B | -1.431286000000 | 0.165484000000  | 0.815637000000  |
| B | -0.882014000000 | 1.402604000000  | -0.345358000000 | H | -2.480548000000 | 0.284412000000  | 1.444207000000  |
| H | -1.554465000000 | 2.427090000000  | -0.465253000000 | B | -0.881814000000 | -1.430171000000 | 0.196103000000  |
| B | 0.881601000000  | 1.402858000000  | -0.345239000000 | H | -1.549919000000 | -2.419096000000 | 0.479656000000  |
| H | 1.553613000000  | 2.427613000000  | -0.465259000000 | B | 0.882200000000  | -1.429918000000 | 0.196197000000  |
| B | -0.000293000000 | 1.154795000000  | 1.199563000000  | H | 1.550625000000  | -2.418620000000 | 0.479818000000  |
| H | -0.000311000000 | 2.001187000000  | 2.094375000000  | B | 0.000264000000  | -1.237981000000 | -1.394576000000 |
| B | 1.431143000000  | 0.165931000000  | 0.815808000000  | B | 1.417072000000  | -0.190879000000 | -0.952788000000 |
| H | 2.480339000000  | 0.285086000000  | 1.444448000000  | B | -1.416882000000 | -0.191355000000 | -0.952885000000 |
| B | 0.000054000000  | -0.596979000000 | 1.522628000000  | H | 2.522460000000  | -0.287667000000 | -1.486548000000 |
| H | 0.000054000000  | -1.051019000000 | 2.662061000000  | H | -2.522178000000 | -0.288441000000 | -1.486768000000 |

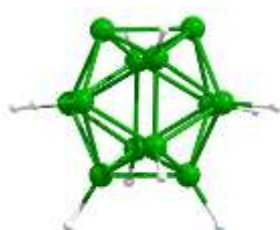

**Figure S30.** Optimized geometry of  $[B_{12}H_{10}]^{2-}$ .

Total energy = -304.0700857 a.u.

Cartesian coordinates for the calculated structure  $[B_{12}H_{10}]^{2-}$  (in Å)

|   |                 |                 |                 |   |                 |                 |                 |
|---|-----------------|-----------------|-----------------|---|-----------------|-----------------|-----------------|
| B | 0.000021000002  | 0.593502040390  | -1.695235123696 | B | -1.431285105008 | 0.165488011960  | 0.815637060249  |
| B | -0.882010063932 | 1.402606100577  | -0.345358024891 | H | -2.480547178972 | 0.284418020522  | 1.444207105419  |
| H | -1.554459110873 | 2.427094175410  | -0.465253033675 | B | -0.881818062551 | -1.430169101941 | 0.196103014003  |
| B | 0.881605063416  | 1.402856099785  | -0.345239025098 | H | -1.549925109620 | -2.419092174013 | 0.479656034514  |
| H | 1.553619110783  | 2.427609176000  | -0.465259033486 | B | 0.882196064443  | -1.429920102878 | 0.196197013874  |
| B | -0.000290000021 | 1.154795083091  | 1.199563086765  | H | 1.550619109707  | -2.418624174946 | 0.479818034720  |
| H | -0.000306000022 | 2.001187141869  | 2.094375149583  | B | 0.000261000019  | -1.237981090454 | -1.394576100412 |
| B | 1.431144100438  | 0.165927012114  | 0.815808058585  | B | 1.417072102614  | -0.190883013823 | -0.952788066038 |
| H | 2.480340180708  | 0.285080020731  | 1.444448103321  | B | -1.416882101523 | -0.191351013949 | -0.952885069520 |
| B | 0.000053000004  | -0.596979041839 | 1.522628109784  | H | 2.522459181283  | -0.287674020618 | -1.486548106433 |
| H | 0.000051000004  | -1.051019074725 | 2.662061193212  | H | -2.522179183017 | -0.288434020749 | -1.486768106583 |

## References

- 1 G. H. Llinás, M. Mena, F. Palacios, P. Royo and R. Serrano, *J. Organomet. Chem.*, 1988, **340**, 37–40.
- 2 G. E. Ryschlewitsch, K. C. Nainan, S. R. Miller, L. J. Todd, W. J. Dewkett, M. Grace, H. Beall, M. F. Hawthorne and R. Leyden, *Inorg. Synth.*, 2007, **15**, 111–118.
- 3 (a) J. J. Led and H. Gesmar, *Chem. Rev.*, 1991, **91**, 1413–1426; (b) L. Yang, R. Simionescu, A. Lough and H. Yan, *Dyes Pigm.*, 2011, **91**, 264–267; (c) R. Weiss and R. N. Grimes, *J. Am. Chem. Soc.*, 1978, **100**, 1401–1405.
- 4 S. Kar, S. Bairagi, A. Haridas, G. Joshi, E. D. Jemmis and S. Ghosh, *Angew. Chem. Int. Ed.*, 2022, **61**, e202208293.
- 5 (a) H. W. Roesky, I. Leichtweis and M. Noltemeyer, *Inorg. Chem.*, 1993, **32**, 5102–5104; (b) F. Palacios, P. Royo, R. Serrano, J. L. Balcázar, I. Fonseca, F. Florencio, *J. Organomet. Chem.*, 1989, **375**, 51–58.
- 6 A. Altomare, G. Cascarano, C. Giacovazzo, A. Guagliardi, M. C. Burla, G. Polidori and M. Camalli, *J. Appl. Crystallogr.*, 1994, **27**, 435–436.
- 7 G. M. Sheldrick, *Acta Cryst.*, 2015, **C71**, 3–8.
- 8 O. V. Dolomanov, L. J. Bourhis, R. J. Gildea, J. A. K. Howard and H. Puschmann, *J. Appl. Cryst.*, 2009, **42**, 339.
- 9 M. J. Frisch, G. W. Trucks, H. B. Schlegel, G. E. Scuseria, M. A. Robb, J. R. Cheeseman, G. Scalmani, V. Barone, B. Mennucci, G. A. Petersson, H. Nakatsuji, M. Caricato, X. Li, H. P. Hratchian, A. F. Izmaylov, J. Bloino, G. Zheng, J. L. Sonnenberg, M. Hada, M. Ehara, K. Toyota, R. Fukuda, J. Hasegawa, M. Ishida, T. Nakajima, Y. Honda, O. Kitao, H. Nakai, T. Vreven, J. A. Montgomery Jr., J. E. Peralta, F. Ogliaro, M. Bearpark, J. J. Heyd, E. Brothers, K. N. Kudin, V. N. Staroverov, R. Kobayashi, J. Normand, K. Raghavachari, A. Rendell, J. C. Burant, S. S. Iyengar, J. Tomasi, M. Cossi, N. Rega, J. M. Millam, M. Klene, J. E. Knox, J. B. Cross, V. Bakken, C. Adamo, J. Jaramillo, R. Gomperts, R. E. Stratmann, O. Yazyev, A. J. Austin, R. Cammi, C. Pomelli, J. W. Ochterski, R. L. Martin, K. Morokuma, V. G. Zakrzewski, G. A. Voth, P. Salvador, J. J. Dannenberg, S. Dapprich, A. D. Daniels, Ö. Farkas, J. B. Foresman, J. V. Ortiz, J. Cioslowski, D. J. Fox, *Gaussian 09, Revision C.01*, Gaussian, Inc., Wallingford, CT, 2010.
- 10 J. P. Perdew, K. Burke and M. Ernzerhof, *Phys. Rev. Lett.*, 1996, **77**, 3865–3868.
- 11 EMSL Basis Set Exchange Library. <https://bse.pnl.gov/bse/portal>
- 12 F. London, *J. Phys. Radium.*, 1937, **8**, 397–409.
- 13 R. Ditchfield, *Mol. Phys.*, 1974, **27**, 789–807.
- 14 K. Wolinski, J. F. Hinton and P. Pulay, *J. Am. Chem. Soc.*, 1990, **112**, 8251–8260.
- 15 (a) A. D. Becke, *Phys. Rev. A.*, 1988, **38**, 3098–3100; (b) C. Lee, W. Yang and R. G. Parr, *Phys. Rev. B.*, 1988, **37**, 785–789; (c) A. D. Becke, *J. Chem. Phys.*, 1993, **98**, 5648–5652.
- 16 T. P. Onak, H. L. Landesman, R. E. Williams and I. Shapiro, *J. Phys. Chem.*, 1959, **63**, 1533–1535.
- 17 (a) E. D. Glendening, A. E. Reed, J. E. Carpenter and F. Weinhold, *NBO Program 3.1*, W. T. Madison, 1988; (b) A. E. Reed, F. Weinhold and L. A. Curtiss, *Chem. Rev.*, 1988, **88**, 899–926; (c) F. Weinhold and R. Landis, *Valency and bonding: A natural bond orbital donor-acceptor perspective*; Cambridge University Press: Cambridge, U.K, 2005.
- 18 K. Wiberg, *Tetrahedron*, 1968, **24**, 1083–1096.
- 19 (a) R. F. W. Bader, *Atoms in Molecules: A Quantum Theory*; Oxford University Press: Oxford, U. K., 1990; (b) R. F. W. Bader, *J. Phys. Chem. A.*, 1998, **102**, 7314–7323; (c) R. F. W. Bader, *Chem. Rev.*, 1991, **91**, 893–928.
- 20 T. Lu, F. Chen, *J. Comput. Chem.*, 2012, **33**, 580–592.
- 21 I. I. Dennington, R. T. Keith, J. Millam, K. Eppinnett, W. L. Hovell and R. Gilliland, *GaussView, Version 3.09*; Semichem Inc.: Shawnee Mission, KS, 2003.
- 22 G. A. Zhurko, <http://www.chemcraftprog.com>.
